# Supplementary material for: De novo Assembly and Transcriptomic Profiling of the Grazing Response in Stipa grandis
Source: PLoS One. 2015 Apr 13;10(4):e0122641. doi: 10.1371/journal.pone.0122641 (PMC4395228; doi:10.1371/journal.pone.0122641)
Supplement: S2 Table — (XLS) [file pone.0122641.s004.xls]

## Sheet: GO functional classification
GO functional classification analysis of differentially expressed genes between FS and OS
Ontology	Class	number_of_FS-vs-OS.All-Unigene
biological_process	biological adhesion	13
biological_process	biological regulation	1078
biological_process	cell proliferation	22
biological_process	cellular component organization or biogenesis	639
biological_process	cellular process	3437
biological_process	death	124
biological_process	developmental process	671
biological_process	establishment of localization	890
biological_process	growth	105
biological_process	immune system process	134
biological_process	localization	935
biological_process	locomotion	8
biological_process	metabolic process	3450
biological_process	multi-organism process	390
biological_process	multicellular organismal process	646
biological_process	negative regulation of biological process	175
biological_process	positive regulation of biological process	178
biological_process	regulation of biological process	990
biological_process	reproduction	409
biological_process	reproductive process	406
biological_process	response to stimulus	1784
biological_process	signaling	346
biological_process	single-organism process	916
cellular_component	cell	4836
cellular_component	cell junction	97
cellular_component	cell part	4836
cellular_component	extracellular matrix	10
cellular_component	extracellular matrix part	9
cellular_component	extracellular region	231
cellular_component	extracellular region part	3
cellular_component	macromolecular complex	425
cellular_component	membrane	1924
cellular_component	membrane part	679
cellular_component	membrane-enclosed lumen	165
cellular_component	nucleoid	36
cellular_component	organelle	4158
cellular_component	organelle part	801
cellular_component	symplast	97
molecular_function	antioxidant activity	77
molecular_function	binding	2959
molecular_function	catalytic activity	3042
molecular_function	channel regulator activity	1
molecular_function	electron carrier activity	136
molecular_function	enzyme regulator activity	44
molecular_function	molecular transducer activity	70
molecular_function	nucleic acid binding transcription factor activity	199
molecular_function	nutrient reservoir activity	3
molecular_function	protein binding transcription factor activity	14
molecular_function	receptor activity	35
molecular_function	structural molecule activity	138
molecular_function	transporter activity	486

## Sheet: KEGG pathway analysis
Pathway enrichment analysis of differentially expressed genes between FS and OS
Pathway with Q-value ≤ 0.05
#	Pathway	Pathway ID	DEGs with pathway annotation	All-unigene with pathway annotation	P-value	Q-value
1	Plant-pathogen interaction	ko04626	675 (10.87%)	2662 (6.52%)	2.97309e-45	3.59744e-43
2	mRNA surveillance pathway	ko03015	830 (13.36%)	4204 (10.29%)	3.42148e-17	2.06999e-15
3	RNA transport	ko03013	951 (15.31%)	4925 (12.06%)	5.88875e-17	2.37513e-15
4	RNA polymerase	ko03020	184 (2.96%)	765 (1.87%)	7.19482e-11	2.17643e-09
5	Photosynthesis - antenna proteins	ko00196	25 (0.4%)	46 (0.11%)	8.79141e-10	2.12752e-08
6	Phenylpropanoid biosynthesis	ko00940	149 (2.4%)	630 (1.54%)	1.43614e-08	2.89621e-07
7	Cutin, suberine and wax biosynthesis	ko00073	51 (0.82%)	156 (0.38%)	3.75456e-08	6.49003e-07
8	Zeatin biosynthesis	ko00908	63 (1.01%)	211 (0.52%)	5.03307e-08	7.61252e-07
9	Flavonoid biosynthesis	ko00941	68 (1.09%)	236 (0.58%)	7.09309e-08	9.53626e-07
10	Plant hormone signal transduction	ko04075	345 (5.55%)	1750 (4.28%)	1.26911e-07	1.53563e-06
11	Pyrimidine metabolism	ko00240	223 (3.59%)	1083 (2.65%)	9.51617e-07	1.04678e-05
12	Isoflavonoid biosynthesis	ko00943	34 (0.55%)	97 (0.24%)	1.10702e-06	1.11625e-05
13	Stilbenoid, diarylheptanoid and gingerol biosynthesis	ko00945	59 (0.95%)	214 (0.52%)	2.42836e-06	2.26024e-05
14	Phenylalanine metabolism	ko00360	75 (1.21%)	300 (0.73%)	6.48975e-06	5.609e-05
15	Biosynthesis of secondary metabolites	ko01110	683 (10.99%)	3870 (9.48%)	7.10622e-06	5.73235e-05
16	Metabolic pathways	ko01100	1916 (30.84%)	11694 (28.63%)	1.67625e-05	0.000126767
17	Limonene and pinene degradation	ko00903	44 (0.71%)	170 (0.42%)	0.000210924	0.00150128
18	Ascorbate and aldarate metabolism	ko00053	48 (0.77%)	196 (0.48%)	0.00044962	0.00302244
19	Pentose and glucuronate interconversions	ko00040	185 (2.98%)	971 (2.38%)	0.000599361	0.00368167
20	Endocytosis	ko04144	722 (11.62%)	4266 (10.45%)	0.000608541	0.00368167
21	Ether lipid metabolism	ko00565	670 (10.79%)	3945 (9.66%)	0.000684267	0.00394268
22	Starch and sucrose metabolism	ko00500	267 (4.3%)	1474 (3.61%)	0.00110142	0.00595455
23	Benzoxazinoid biosynthesis	ko00402	22 (0.35%)	74 (0.18%)	0.00113186	0.00595455
24	Diterpenoid biosynthesis	ko00904	28 (0.45%)	111 (0.27%)	0.0040587	0.020134
25	Carotenoid biosynthesis	ko00906	53 (0.85%)	244 (0.6%)	0.00415991	0.020134
26	Other glycan degradation	ko00511	37 (0.6%)	162 (0.4%)	0.00653791	0.0301499
27	beta-Alanine metabolism	ko00410	28 (0.45%)	115 (0.28%)	0.00682416	0.0301499
28	Purine metabolism	ko00230	208 (3.35%)	1166 (2.85%)	0.00711941	0.0301499
29	Circadian rhythm - plant	ko04712	65 (1.05%)	318 (0.78%)	0.00722601	0.0301499
30	Taurine and hypotaurine metabolism	ko00430	12 (0.19%)	38 (0.09%)	0.00860453	0.0347049
31	Vitamin B6 metabolism	ko00750	16 (0.26%)	57 (0.14%)	0.00927072	0.0361857
32	Monoterpenoid biosynthesis	ko00902	11 (0.18%)	34 (0.08%)	0.00959821	0.0362932
