# Supplementary material for: De novo Assembly and Transcriptomic Profiling of the Grazing Response in Stipa grandis
Source: PLoS One. 2015 Apr 13;10(4):e0122641. doi: 10.1371/journal.pone.0122641 (PMC4395228; doi:10.1371/journal.pone.0122641)
Supplement: S3 Table — (XLS) [file pone.0122641.s005.xls]

## Sheet: genes related to abiotic stress
A summary of the genes related to abiotic stress
gene ID	geneLength	FS_rawfragments	OS_rawfragments	FS_FPKM	OS_FPKM	log2(OS_FPKM/FS_FPKM)	up/down	pvalue	FDR	Nr-ID	Nr-Score	Nr-Evalue	Nr-annotation	Swissprot-ID	Swissprot-Score	Swissprot-Evalue	Swissprot-annotation	COG-Protein-or-Domain	COG-Score	COG-Evalue	COG-ID	COG-Function-Description	KO_id	KEGG-Evalue	KEGG-Score	KEGG-Gene	ko_definition	GO-BiologicalProcess	GO-MolecularFunction	Go-CellularComponent	Pathway ID//Pathway
AOS
CL12787.Contig1_All	578	49	312	2.7802	18.1455	2.7064	Up	1.2149e-49	4.4939e-48	gi|7452981|emb|CAB86384.1|	211.5	5e-54	allene oxide synthase [Hordeum vulgare subsp. vulgare]	sp|Q7XYS3|C74A2_ORYSJ	184	4e-47	Allene oxide synthase 2 OS=Oryza sativa subsp. japonica GN=CYP74A2 PE=2 SV=2	XF1267	53.1	3e-07	COG5297	Cellobiohydrolase A (1,4-beta-cellobiosidase A)	K01723	4e-53	205	zma:542150	hydroperoxide dehydratase [EC:4.2.1.92]	GO:0031407//oxylipin metabolic process;GO:0009753//response to jasmonic acid stimulus;GO:0055114//oxidation-reduction process;GO:0009620//response to fungus;GO:0009611//response to wounding	GO:0009978//allene oxide synthase activity;GO:0016705//oxidoreductase activity, acting on paired donors, with incorporation or reduction of molecular oxygen;GO:0009055//electron carrier activity;GO:0020037//heme binding;GO:0005506//iron ion binding	GO:0005739//mitochondrion;GO:0009941//chloroplast envelope;GO:0009535//chloroplast thylakoid membrane;GO:0010287//plastoglobule	ko01100//Metabolic pathways;ko00592//alpha-Linolenic acid metabolism
CL9995.Contig1_All	1292	32	254	0.8123	6.6087	3.0243	Up	1.6122e-45	5.4174e-44	gi|536709664|gb|AGU41845.1|	671	0	allene oxide synthase, partial [Triticum aestivum]	sp|Q7XYS3|C74A2_ORYSJ	607	5e-174	Allene oxide synthase 2 OS=Oryza sativa subsp. japonica GN=CYP74A2 PE=2 SV=2	SPBC28F2.12	81.3	3e-15	COG0086	DNA-directed RNA polymerase, beta' subunit/160 kD subunit	K01723	5e-176	615	zma:542150	hydroperoxide dehydratase [EC:4.2.1.92]	GO:0031407//oxylipin metabolic process;GO:0009753//response to jasmonic acid stimulus;GO:0055114//oxidation-reduction process;GO:0009620//response to fungus;GO:0009611//response to wounding	GO:0009978//allene oxide synthase activity;GO:0016705//oxidoreductase activity, acting on paired donors, with incorporation or reduction of molecular oxygen;GO:0009055//electron carrier activity;GO:0020037//heme binding;GO:0005506//iron ion binding	GO:0005739//mitochondrion;GO:0009941//chloroplast envelope;GO:0009535//chloroplast thylakoid membrane;GO:0010287//plastoglobule	ko01100//Metabolic pathways;ko00592//alpha-Linolenic acid metabolism
Unigene7257_All	366	358	93	32.0781	8.5417	-1.909	Down	1.6683e-36	4.5816e-35	gi|357138428|ref|XP_003570794.1|	181.4	3e-45	PREDICTED: allene oxide synthase, chloroplastic-like [Brachypodium distachyon]	sp|Q6Z6K9|C74A4_ORYSJ	99.4	5e-22	Allene oxide synthase 4 OS=Oryza sativa subsp. japonica GN=CYP74A4 PE=2 SV=1	SPCC965.04c	47	8e-06	COG0465	ATP-dependent Zn proteases	K10528	1e-41	165	zma:542163	hydroperoxide lyase [EC:4.1.2.-]	GO:0055114//oxidation-reduction process	GO:0020037//heme binding;GO:0016705//oxidoreductase activity, acting on paired donors, with incorporation or reduction of molecular oxygen;GO:0004497//monooxygenase activity;GO:0005506//iron ion binding;GO:0009055//electron carrier activity;GO:0016829//lyase activity	-	ko00592//alpha-Linolenic acid metabolism
CL9995.Contig2_All	1228	31	215	0.8279	5.8855	2.8296	Up	2.6012e-36	7.1104e-35	gi|536709664|gb|AGU41845.1|	671.4	0	PREDICTED: allene oxide synthase, chloroplastic-like [Brachypodium distachyon]	sp|Q7XYS3|C74A2_ORYSJ	607	4e-174	Allene oxide synthase 2 OS=Oryza sativa subsp. japonica GN=CYP74A2 PE=2 SV=2	SPBC28F2.12	81.3	3e-15	COG0086	DNA-directed RNA polymerase, beta' subunit/160 kD subunit	K01723	2e-176	616	zma:542150	hydroperoxide dehydratase [EC:4.2.1.92]	GO:0031407//oxylipin metabolic process;GO:0009753//response to jasmonic acid stimulus;GO:0055114//oxidation-reduction process;GO:0009620//response to fungus;GO:0009611//response to wounding	GO:0009978//allene oxide synthase activity;GO:0016705//oxidoreductase activity, acting on paired donors, with incorporation or reduction of molecular oxygen;GO:0009055//electron carrier activity;GO:0020037//heme binding;GO:0005506//iron ion binding	GO:0005739//mitochondrion;GO:0009941//chloroplast envelope;GO:0009535//chloroplast thylakoid membrane;GO:0010287//plastoglobule	ko01100//Metabolic pathways;ko00592//alpha-Linolenic acid metabolism
LOX
CL7512.Contig1_All	2231	171	2184	2.5136	32.9076	3.7106	Up	0	0	gi|357116348|ref|XP_003559944.1|	1254.2	0	PREDICTED: linoleate 9S-lipoxygenase 2-like [Brachypodium distachyon]	sp|P29250|LOX2_ORYSJ	1199	0	Linoleate 9S-lipoxygenase 2 OS=Oryza sativa subsp. japonica GN=LOX1.1 PE=2 SV=2	YGL028c	57	1e-07	COG5309	Exo-beta-1,3-glucanase	K15718	0	1254	bdi:100833634	linoleate 9S-lipoxygenase [EC:1.13.11.58]	GO:0009753//response to jasmonic acid stimulus;GO:0022900//electron transport chain;GO:0048364//root development;GO:0009611//response to wounding;GO:0009737//response to abscisic acid stimulus;GO:0009816//defense response to bacterium, incompatible interaction;GO:0031408//oxylipin biosynthetic process	GO:0016165//lipoxygenase activity;GO:0005506//iron ion binding	GO:0009507//chloroplast	ko00591//Linoleic acid metabolism
CL789.Contig2_All	235	31	610	4.3261	87.2579	4.3341	Up	5.3188e-144	6.0734e-142	gi|474296593|gb|EMS61461.1|	147.9	3e-35	Lipoxygenase 2 [Triticum urartu]	sp|P29114|LOX1_HORVU	135	7e-33	Linoleate 9S-lipoxygenase 1 OS=Hordeum vulgare GN=LOX1.1 PE=1 SV=2	--	--	--	--	--	K15718	5e-33	137	bdi:100833634	linoleate 9S-lipoxygenase [EC:1.13.11.58]	GO:0031408//oxylipin biosynthetic process;GO:0055114//oxidation-reduction process	GO:0005506//iron ion binding;GO:0016165//lipoxygenase activity	-	ko01100//Metabolic pathways;ko00592//alpha-Linolenic acid metabolism;ko00591//Linoleic acid metabolism
CL9755.Contig1_All	224	16	357	2.3425	53.5751	4.5154	Up	3.8972e-87	2.4859e-85	gi|474296593|gb|EMS61461.1|	146.4	1e-34	Lipoxygenase 2 [Triticum urartu]	sp|P29250|LOX2_ORYSJ	133	3e-32	Linoleate 9S-lipoxygenase 2 OS=Oryza sativa subsp. japonica GN=LOX1.1 PE=2 SV=2	--	--	--	--	--	K15718	1e-34	142	bdi:100833634	linoleate 9S-lipoxygenase [EC:1.13.11.58]	GO:0009753//response to jasmonic acid stimulus;GO:0022900//electron transport chain;GO:0048364//root development;GO:0009611//response to wounding;GO:0009737//response to abscisic acid stimulus;GO:0009816//defense response to bacterium, incompatible interaction;GO:0031408//oxylipin biosynthetic process	GO:0016165//lipoxygenase activity;GO:0005506//iron ion binding	GO:0009507//chloroplast	ko01100//Metabolic pathways;ko00592//alpha-Linolenic acid metabolism;ko00591//Linoleic acid metabolism
CL7512.Contig2_All	670	102	220	4.9927	11.038	1.1446	Up	6.8596e-12	6.899e-11	gi|357116348|ref|XP_003559944.1|	327.4	9e-89	PREDICTED: linoleate 9S-lipoxygenase 2-like [Brachypodium distachyon]	sp|P29250|LOX2_ORYSJ	326	8e-90	Linoleate 9S-lipoxygenase 2 OS=Oryza sativa subsp. japonica GN=LOX1.1 PE=2 SV=2	XF1267	55.1	1e-07	COG5297	Cellobiohydrolase A (1,4-beta-cellobiosidase A)	K15718	1e-89	327	bdi:100833634	linoleate 9S-lipoxygenase [EC:1.13.11.58]	GO:0009753//response to jasmonic acid stimulus;GO:0022900//electron transport chain;GO:0048364//root development;GO:0009611//response to wounding;GO:0009737//response to abscisic acid stimulus;GO:0009816//defense response to bacterium, incompatible interaction;GO:0031408//oxylipin biosynthetic process	GO:0016165//lipoxygenase activity;GO:0005506//iron ion binding	GO:0009507//chloroplast	ko00591//Linoleic acid metabolism
Unigene11705_All	562	49	114	2.8593	6.8189	1.2539	Up	1.1587e-07	7.8904e-07	gi|357120556|ref|XP_003561993.1|	151	8e-36	PREDICTED: probable lipoxygenase 6-like [Brachypodium distachyon]	sp|Q8H016|LOX6_ORYSJ	103	8e-23	Probable lipoxygenase 6 OS=Oryza sativa subsp. japonica GN=Os03g0179900 PE=2 SV=2	Cgl1939	52.8	4e-07	COG0532	Translation initiation factor 2 (IF-2; GTPase)	K00454	9e-37	150	bdi:100829163	lipoxygenase [EC:1.13.11.12]	GO:0006633//fatty acid biosynthetic process	GO:0046872//metal ion binding;GO:0016702//oxidoreductase activity, acting on single donors with incorporation of molecular oxygen, incorporation of two atoms of oxygen	GO:0009536//plastid	ko01100//Metabolic pathways;ko04144//Endocytosis;ko00565//Ether lipid metabolism;ko00564//Glycerophospholipid metabolism;ko00592//alpha-Linolenic acid metabolism;ko00591//Linoleic acid metabolism
Unigene15072_All	552	35	92	2.0794	5.6026	1.4299	Up	1.4231e-07	9.6044e-07	gi|357163793|ref|XP_003579848.1|	92.4	3e-18	PREDICTED: putative lipoxygenase 5-like [Brachypodium distachyon]	sp|Q6ZCX3|FH6_ORYSJ	53.5	7e-08	Formin-like protein 6 OS=Oryza sativa subsp. japonica GN=FH6 PE=2 SV=2	--	--	--	--	--	K00454	3e-11	66.2	sbi:SORBI_06g018040	lipoxygenase [EC:1.13.11.12]	GO:0008610//lipid biosynthetic process;GO:0048443//stamen development;GO:0044237//cellular metabolic process	GO:0005488//binding;GO:0016491//oxidoreductase activity	GO:0009536//plastid	ko01100//Metabolic pathways;ko00592//alpha-Linolenic acid metabolism;ko00591//Linoleic acid metabolism
FAD
CL40.Contig4_All	2063	15454	31631	245.668	515.414	1.069	Up	0	0	gi|357112724|ref|XP_003558157.1|	823.9	0	PREDICTED: omega-3 fatty acid desaturase, chloroplastic-like [Brachypodium distachyon]	sp|P48621|FAD3C_SOYBN	663	0	Omega-3 fatty acid desaturase, chloroplastic OS=Glycine max GN=FAD7 PE=2 SV=1	all1597	383	6e-106	COG3239	Fatty acid desaturase	K10257	0	815	bdi:100831377	omega-3 fatty acid desaturase (delta-15 desaturase) [EC:1.14.19.-]	GO:0009409//response to cold;GO:0006636//unsaturated fatty acid biosynthetic process;GO:0055114//oxidation-reduction process;GO:0080167//response to karrikin	GO:0042389//omega-3 fatty acid desaturase activity;GO:0016717//oxidoreductase activity, acting on paired donors, with oxidation of a pair of donors resulting in the reduction of molecular oxygen to two molecules of water	GO:0031969//chloroplast membrane;GO:0005783//endoplasmic reticulum;GO:0005739//mitochondrion	ko01040//Biosynthesis of unsaturated fatty acids
CL40.Contig1_All	623	165	402	8.6857	21.6911	1.3204	Up	2.8326e-25	5.5826e-24	gi|357155568|ref|XP_003577162.1|	440.7	6e-123	PREDICTED: omega-3 fatty acid desaturase, chloroplastic-like [Brachypodium distachyon]	sp|P48620|FAD3C_SESIN	361	2e-100	Omega-3 fatty acid desaturase, chloroplastic OS=Sesamum indicum GN=FAD7 PE=2 SV=1	all1597	260	1e-69	COG3239	Fatty acid desaturase	K10257	7e-124	440	bdi:100824939	omega-3 fatty acid desaturase (delta-15 desaturase) [EC:1.14.19.-]	GO:0009409//response to cold;GO:0006636//unsaturated fatty acid biosynthetic process;GO:0055114//oxidation-reduction process;GO:0080167//response to karrikin	GO:0042389//omega-3 fatty acid desaturase activity;GO:0016717//oxidoreductase activity, acting on paired donors, with oxidation of a pair of donors resulting in the reduction of molecular oxygen to two molecules of water	GO:0009941//chloroplast envelope;GO:0016020//membrane;GO:0005783//endoplasmic reticulum	ko01040//Biosynthesis of unsaturated fatty acids
Unigene22017_All	392	273	544	22.8393	46.6504	1.0304	Up	3.5828e-23	6.5473e-22	gi|357147907|ref|XP_003574539.1|	110.5	6e-24	PREDICTED: omega-6 fatty acid desaturase, chloroplastic-like [Brachypodium distachyon]	--	--	--	--	--	--	--	--	--	K10255	6e-25	110	bdi:100833718	omega-6 fatty acid desaturase (delta-12 desaturase) [EC:1.14.19.-]	GO:0008152//metabolic process	-	GO:0009507//chloroplast	ko01040//Biosynthesis of unsaturated fatty acids
CL5585.Contig3_All	1107	272	121	8.058	3.6744	-1.1329	Down	8.5387e-14	9.7571e-13	gi|357111672|ref|XP_003557636.1|	379	6e-104	PREDICTED: uncharacterized protein LOC100829938 isoform 1 [Brachypodium distachyon]	sp|P42735|CDI8_ARATH	144	9e-35	Cadmium-induced protein AS8 OS=Arabidopsis thaliana GN=At4g19070 PE=2 SV=1	slr0599	50.8	4e-06	COG0515	Serine/threonine protein kinase	K12418	7e-08	56.6	cre:CHLREDRAFT_32523	fatty acid desaturase (delta-4 desaturase) [EC:1.14.19.-]	-	-	GO:0005739//mitochondrion;GO:0009536//plastid	ko01100//Metabolic pathways;ko00190//Oxidative phosphorylation
CL12517.Contig4_All	657	137	39	6.8385	1.9955	-1.7769	Down	1.214e-13	1.3737e-12	gi|302833525|ref|XP_002948326.1|	68.6	7e-11	hypothetical protein VOLCADRAFT_88561 [Volvox carteri f. nagariensis] >gi|300266546|gb|EFJ50733.1| hypothetical protein VOLCADRAFT_88561 [Volvox carteri f. nagariensis]	sp|Q9LVN1|FH13_ARATH	58.9	2e-09	Formin-like protein 13 OS=Arabidopsis thaliana GN=FH13 PE=2 SV=3	YPO2725	62	8e-10	COG3501	Uncharacterized protein conserved in bacteria	K12418	6e-07	52.4	cre:CHLREDRAFT_32523	fatty acid desaturase (delta-4 desaturase) [EC:1.14.19.-]	-	-	-	ko03013//RNA transport;ko01100//Metabolic pathways;ko04144//Endocytosis;ko00565//Ether lipid metabolism;ko00564//Glycerophospholipid metabolism;ko03022//Basal transcription factors
CL2512.Contig1_All	617	101	21	5.3684	1.1441	-2.2303	Down	1.5791e-13	1.7743e-12	gi|308080490|ref|NP_001183334.1|	56.6	2e-07	uncharacterized protein LOC100501738 precursor [Zea mays]	sp|Q9LK03|PERK2_ARATH	68.6	3e-12	Proline-rich receptor-like protein kinase PERK2 OS=Arabidopsis thaliana GN=PERK2 PE=2 SV=3	Rv2264c	60.1	3e-09	COG0443	Molecular chaperone	K12418	3e-10	63.2	cre:CHLREDRAFT_32523	fatty acid desaturase (delta-4 desaturase) [EC:1.14.19.-]	-	-	-	ko03013//RNA transport;ko01100//Metabolic pathways;ko00040//Pentose and glucuronate interconversions;ko04144//Endocytosis;ko00565//Ether lipid metabolism;ko00500//Starch and sucrose metabolism;ko00564//Glycerophospholipid metabolism
CL491.Contig1_All	478	1	38	0.0686	2.6724	5.2838	Up	4.6456e-11	4.3778e-10	gi|378791508|gb|AFC41106.1|	142.1	2e-33	FAD2-1 [Brassica oleracea]	sp|Q39287|FAD6E_BRAJU	137	2e-33	Omega-6 fatty acid desaturase, endoplasmic reticulum OS=Brassica juncea PE=2 SV=1	sll1441	98.2	5e-21	COG3239	Fatty acid desaturase	K10256	2e-33	139	vvi:100258789	omega-6 fatty acid desaturase (delta-12 desaturase) [EC:1.14.19.-]	-	-	-	ko01040//Biosynthesis of unsaturated fatty acids
CL12204.Contig1_All	362	0	26	0	2.4144	11.2374	Up	1.0651e-08	8.1144e-08	gi|326505284|dbj|BAK03029.1|	128.6	2e-29	predicted protein [Hordeum vulgare subsp. vulgare]	sp|P46313|FAD6E_ARATH	110	1e-25	Omega-6 fatty acid desaturase, endoplasmic reticulum OS=Arabidopsis thaliana GN=FAD2 PE=2 SV=1	all1597	82	2e-16	COG3239	Fatty acid desaturase	K10256	8e-28	119	osa:4330523	omega-6 fatty acid desaturase (delta-12 desaturase) [EC:1.14.19.-]	-	-	-	ko01040//Biosynthesis of unsaturated fatty acids
Unigene40701_All	393	0	26	0	2.2239	11.1189	Up	1.0651e-08	8.1112e-08	gi|667825629|ref|XP_007776985.1|	90.1	9e-18	omega-6 fatty acid desaturase (delta-12 desaturase) [Coniosporium apollinis CBS 100218]	sp|P48631|FD6E2_SOYBN	80.1	4e-16	Omega-6 fatty acid desaturase, endoplasmic reticulum isozyme 2 OS=Glycine max GN=FAD2-2 PE=2 SV=1	sll1441	56.6	1e-08	COG3239	Fatty acid desaturase	K10256	5e-18	87.4	bdi:100835723	omega-6 fatty acid desaturase (delta-12 desaturase) [EC:1.14.19.-]	-	GO:0016705//oxidoreductase activity, acting on paired donors, with incorporation or reduction of molecular oxygen	-	ko01040//Biosynthesis of unsaturated fatty acids
CL5434.Contig3_All	555	53	124	3.1318	7.5105	1.2619	Up	2.7456e-08	2.0039e-07	gi|108863907|gb|ABG22328.1|	153.7	1e-36	Omega-3 fatty acid desaturase, chloroplast precursor, putative, expressed [Oryza sativa Japonica Group]	sp|P48619|FAD3C_RICCO	131	3e-31	Omega-3 fatty acid desaturase, chloroplastic OS=Ricinus communis GN=FAD7A-1 PE=2 SV=1	all1597	63.5	2e-10	COG3239	Fatty acid desaturase	K10257	1e-37	153	osa:4351253	omega-3 fatty acid desaturase (delta-15 desaturase) [EC:1.14.19.-]	GO:0009409//response to cold;GO:0006636//unsaturated fatty acid biosynthetic process;GO:0055114//oxidation-reduction process;GO:0080167//response to karrikin	GO:0042389//omega-3 fatty acid desaturase activity;GO:0016717//oxidoreductase activity, acting on paired donors, with oxidation of a pair of donors resulting in the reduction of molecular oxygen to two molecules of water	GO:0009941//chloroplast envelope;GO:0016020//membrane;GO:0005783//endoplasmic reticulum	ko01040//Biosynthesis of unsaturated fatty acids
CL1216.Contig2_All	249	7	44	0.9219	5.9401	2.6878	Up	4.3248e-08	3.0837e-07	gi|326519478|dbj|BAK00112.1|	107.8	4e-23	predicted protein [Hordeum vulgare subsp. vulgare] >gi|326523939|dbj|BAJ96980.1| predicted protein [Hordeum vulgare subsp. vulgare]	sp|Q9FPQ6|GP1_CHLRE	63.5	3e-11	Vegetative cell wall protein gp1 OS=Chlamydomonas reinhardtii GN=GP1 PE=2 SV=1	--	--	--	--	--	K12418	2e-07	52	cre:CHLREDRAFT_32523	fatty acid desaturase (delta-4 desaturase) [EC:1.14.19.-]	-	GO:0016772//transferase activity, transferring phosphorus-containing groups;GO:0008080//N-acetyltransferase activity	-	ko01100//Metabolic pathways;ko04144//Endocytosis;ko00565//Ether lipid metabolism;ko00564//Glycerophospholipid metabolism
CL11091.Contig2_All	317	61	17	6.3107	1.8027	-1.8076	Down	6.2749e-07	3.8978e-06	gi|357167072|ref|XP_003580990.1|	120.6	6e-27	PREDICTED: 21 kDa protein-like [Brachypodium distachyon]	sp|P17407|21KD_DAUCA	68.6	8e-13	21 kDa protein OS=Daucus carota PE=2 SV=1	--	--	--	--	--	K12418	1e-07	52.8	cre:CHLREDRAFT_32523	fatty acid desaturase (delta-4 desaturase) [EC:1.14.19.-]	-	-	GO:0009536//plastid	ko01100//Metabolic pathways;ko04144//Endocytosis;ko00565//Ether lipid metabolism;ko00564//Glycerophospholipid metabolism
CL8701.Contig1_All	591	21	64	1.1653	3.6403	1.6434	Up	1.2287e-06	7.3416e-06	gi|218191282|gb|EEC73709.1|	51.6	8e-06	hypothetical protein OsI_08308 [Oryza sativa Indica Group]	sp|Q9ZT16|AGP4_ARATH	67.8	4e-12	Classical arabinogalactan protein 4 OS=Arabidopsis thaliana GN=AGP4 PE=1 SV=1	all3826	62	7e-10	COG3409	Putative peptidoglycan-binding domain-containing protein	K12418	1e-11	67.8	cre:CHLREDRAFT_32523	fatty acid desaturase (delta-4 desaturase) [EC:1.14.19.-]	-	-	-	--
Unigene12113_All	324	78	31	7.8951	3.2163	-1.2956	Down	9.7352e-06	5.0698e-05	gi|108707600|gb|ABF95395.1|	26.6	9e-15	Omega-3 fatty acid desaturase, chloroplast precursor, putative, expressed [Oryza sativa Japonica Group] >gi|222624722|gb|EEE58854.1| hypothetical protein OsJ_10445 [Oryza sativa Japonica Group]	--	--	--	--	--	--	--	--	--	K10257	2e-13	65.5	sbi:SORBI_01g038500	omega-3 fatty acid desaturase (delta-15 desaturase) [EC:1.14.19.-]	GO:0008152//metabolic process	-	GO:0016020//membrane;GO:0005739//mitochondrion	ko01040//Biosynthesis of unsaturated fatty acids
Unigene42441_All	237	0	15	0	2.1276	11.055	Up	2.5011e-05	0.00012167	gi|225451941|ref|XP_002279468.1|	61.6	3e-09	PREDICTED: proline-rich receptor-like protein kinase PERK8 [Vitis vinifera]	sp|Q9LK03|PERK2_ARATH	54.3	2e-08	Proline-rich receptor-like protein kinase PERK2 OS=Arabidopsis thaliana GN=PERK2 PE=2 SV=3	--	--	--	--	--	K12418	4e-07	51.2	cre:CHLREDRAFT_32523	fatty acid desaturase (delta-4 desaturase) [EC:1.14.19.-]	GO:0044238//primary metabolic process;GO:0044237//cellular metabolic process	GO:0003824//catalytic activity	-	ko01100//Metabolic pathways;ko00040//Pentose and glucuronate interconversions;ko00500//Starch and sucrose metabolism
OPR
CL5872.Contig1_All	1882	11069	30070	192.884	537.102	1.4775	Up	0	0	gi|357124824|ref|XP_003564097.1|	698.7	0	PREDICTED: putative 12-oxophytodienoate reductase 5-like [Brachypodium distachyon]	sp|Q84QK0|OPR1_ORYSJ	668	0	12-oxophytodienoate reductase 1 OS=Oryza sativa subsp. japonica GN=OPR1 PE=2 SV=1	all1865	313	7e-85	COG1902	NADH:flavin oxidoreductases, Old Yellow Enzyme family	K05894	0	677	bdi:100822620	12-oxophytodienoic acid reductase [EC:1.3.1.42]	GO:0009695//jasmonic acid biosynthetic process;GO:0006952//defense response;GO:0055114//oxidation-reduction process	GO:0016629//12-oxophytodienoate reductase activity;GO:0010181//FMN binding	GO:0005739//mitochondrion	ko01100//Metabolic pathways;ko00592//alpha-Linolenic acid metabolism
CL5872.Contig2_All	2350	2796	7252	39.019	103.737	1.4107	Up	0	0	gi|115467092|ref|NP_001057145.1|	54.7	7e-06	Os06g0216300 [Oryza sativa Japonica Group] >gi|75147703|sp|Q84QK0.1|OPR1_ORYSJ RecName: Full=12-oxophytodienoate reductase 1; AltName: Full=12-oxophytodienoate-10,11-reductase 1; Short=OPDA-reductase 1; Short=OsOPR1 >gi|60687503|pir||JC8028 cis-12-oxo-phytodienoic acid-reductase 1 - rice >gi|23495288|dbj|BAC20139.1| 12-oxophytodienoic acid reductase [Oryza sativa] >gi|30140333|emb|CAD89604.1| oxo…	sp|Q84QK0|OPR1_ORYSJ	461	0	12-oxophytodienoate reductase 1 OS=Oryza sativa subsp. japonica GN=OPR1 PE=2 SV=1	all1865	205	3e-52	COG1902	NADH:flavin oxidoreductases, Old Yellow Enzyme family	K05894	0	461	osa:4340490	12-oxophytodienoic acid reductase [EC:1.3.1.42]	GO:0009695//jasmonic acid biosynthetic process;GO:0006952//defense response;GO:0055114//oxidation-reduction process	GO:0016491//oxidoreductase activity;GO:0010181//FMN binding	GO:0005739//mitochondrion	ko01100//Metabolic pathways;ko00592//alpha-Linolenic acid metabolism
CL5872.Contig3_All	2213	3733	9914	55.3201	150.595	1.4448	Up	0	0	gi|326528891|dbj|BAJ97467.1|	58.2	6e-07	predicted protein [Hordeum vulgare subsp. vulgare]	sp|Q84QK0|OPR1_ORYSJ	664	0	12-oxophytodienoate reductase 1 OS=Oryza sativa subsp. japonica GN=OPR1 PE=2 SV=1	all1865	312	1e-84	COG1902	NADH:flavin oxidoreductases, Old Yellow Enzyme family	K05894	0	665	zma:732815	12-oxophytodienoic acid reductase [EC:1.3.1.42]	GO:0009695//jasmonic acid biosynthetic process;GO:0006952//defense response;GO:0055114//oxidation-reduction process	GO:0016629//12-oxophytodienoate reductase activity;GO:0010181//FMN binding	GO:0005739//mitochondrion	ko01100//Metabolic pathways;ko00592//alpha-Linolenic acid metabolism
CL5872.Contig4_All	1860	9433	23820	166.32	430.499	1.3721	Up	0	0	gi|573947166|ref|XP_006655911.1|	678.3	0	PREDICTED: 12-oxophytodienoate reductase 1-like [Oryza brachyantha]	sp|Q84QK0|OPR1_ORYSJ	665	0	12-oxophytodienoate reductase 1 OS=Oryza sativa subsp. japonica GN=OPR1 PE=2 SV=1	all1865	317	3e-86	COG1902	NADH:flavin oxidoreductases, Old Yellow Enzyme family	K05894	0	665	sbi:SORBI_10g007320	12-oxophytodienoic acid reductase [EC:1.3.1.42]	GO:0009695//jasmonic acid biosynthetic process;GO:0006952//defense response;GO:0055114//oxidation-reduction process	GO:0016629//12-oxophytodienoate reductase activity;GO:0010181//FMN binding	GO:0005739//mitochondrion	ko01100//Metabolic pathways;ko00592//alpha-Linolenic acid metabolism
CL5872.Contig8_All	2013	8647	22584	140.873	377.138	1.4207	Up	0	0	gi|162458696|ref|NP_001105899.1|	227.3	0	12-oxo-phytodienoic acid reductase1 [Zea mays]	sp|Q84QK0|OPR1_ORYSJ	464	0	12-oxophytodienoate reductase 1 OS=Oryza sativa subsp. japonica GN=OPR1 PE=2 SV=1	all1865	206	2e-52	COG1902	NADH:flavin oxidoreductases, Old Yellow Enzyme family	K05894	0	474	bdi:100822620	12-oxophytodienoic acid reductase [EC:1.3.1.42]	GO:0009695//jasmonic acid biosynthetic process;GO:0009611//response to wounding;GO:0006952//defense response;GO:0046686//response to cadmium ion;GO:0009751//response to salicylic acid stimulus;GO:0055114//oxidation-reduction process	GO:0016629//12-oxophytodienoate reductase activity;GO:0010181//FMN binding	GO:0005739//mitochondrion	ko01100//Metabolic pathways;ko00592//alpha-Linolenic acid metabolism
CL5872.Contig6_All	373	148	628	13.0125	56.597	2.1208	Up	5.9449e-74	3.158e-72	gi|115467092|ref|NP_001057145.1|	53.9	8e-25	Os06g0216300 [Oryza sativa Japonica Group] >gi|75147703|sp|Q84QK0.1|OPR1_ORYSJ RecName: Full=12-oxophytodienoate reductase 1; AltName: Full=12-oxophytodienoate-10,11-reductase 1; Short=OPDA-reductase 1; Short=OsOPR1 >gi|60687503|pir||JC8028 cis-12-oxo-phytodienoic acid-reductase 1 - rice >gi|23495288|dbj|BAC20139.1| 12-oxophytodienoic acid reductase [Oryza sativa] >gi|30140333|emb|CAD89604.1| oxo…	sp|Q84QK0|OPR1_ORYSJ	80.5	3e-26	12-oxophytodienoate reductase 1 OS=Oryza sativa subsp. japonica GN=OPR1 PE=2 SV=1	mll2211	35	6e-06	COG1902	NADH:flavin oxidoreductases, Old Yellow Enzyme family	K05894	6e-26	80.5	osa:4340490	12-oxophytodienoic acid reductase [EC:1.3.1.42]	GO:0009695//jasmonic acid biosynthetic process;GO:0006952//defense response	GO:0016491//oxidoreductase activity	GO:0005739//mitochondrion	ko01100//Metabolic pathways;ko00592//alpha-Linolenic acid metabolism
Unigene18493_All	219	190	411	28.4522	63.0871	1.1488	Up	4.85e-21	8.1358e-20	gi|194688462|gb|ACF78315.1|	54.7	4e-07	unknown [Zea mays] >gi|224030353|gb|ACN34252.1| unknown [Zea mays]	sp|Q8GYB8|OPR2_ARATH	47.8	1e-06	12-oxophytodienoate reductase 2 OS=Arabidopsis thaliana GN=OPR2 PE=2 SV=2	--	--	--	--	--	K05894	3e-08	54.7	zma:732815	12-oxophytodienoic acid reductase [EC:1.3.1.42]	-	-	-	ko01100//Metabolic pathways;ko00592//alpha-Linolenic acid metabolism
CL5170.Contig2_All	567	76	27	4.3958	1.6008	-1.4573	Down	1.808e-06	1.0566e-05	gi|375311611|gb|AFA51066.1|	250	1e-65	12-oxophytodienoic acid reductase [Hordeum vulgare]	sp|Q8LAH7|OPR1_ARATH	222	1e-58	12-oxophytodienoate reductase 1 OS=Arabidopsis thaliana GN=OPR1 PE=1 SV=2	VCA0993	133	2e-31	COG1902	NADH:flavin oxidoreductases, Old Yellow Enzyme family	K05894	8e-60	227	mtr:MTR_5g006800	12-oxophytodienoic acid reductase [EC:1.3.1.42]	GO:0055114//oxidation-reduction process	GO:0016491//oxidoreductase activity;GO:0010181//FMN binding	-	ko01100//Metabolic pathways;ko00592//alpha-Linolenic acid metabolism
CL5872.Contig7_All	375	9	38	0.7871	3.4064	2.1136	Up	1.04e-05	5.3939e-05	gi|357124824|ref|XP_003564097.1|	197.6	4e-50	PREDICTED: putative 12-oxophytodienoate reductase 5-like [Brachypodium distachyon]	sp|Q84QK0|OPR1_ORYSJ	192	6e-50	12-oxophytodienoate reductase 1 OS=Oryza sativa subsp. japonica GN=OPR1 PE=2 SV=1	RSc1202	82.4	2e-16	COG1902	NADH:flavin oxidoreductases, Old Yellow Enzyme family	K05894	3e-51	197	bdi:100822620	12-oxophytodienoic acid reductase [EC:1.3.1.42]	GO:0009695//jasmonic acid biosynthetic process;GO:0006952//defense response;GO:0055114//oxidation-reduction process	GO:0016491//oxidoreductase activity;GO:0010181//FMN binding	GO:0005739//mitochondrion	ko01100//Metabolic pathways;ko00592//alpha-Linolenic acid metabolism
PLD
CL15321.Contig2_All	1188	136	292	3.7543	8.2625	1.138	Up	3.5242e-15	4.3729e-14	gi|357140880|ref|XP_003571990.1|	261.2	2e-68	PREDICTED: phospholipase D beta 1-like [Brachypodium distachyon]	sp|P06599|EXTN_DAUCA	69.3	1e-12	Extensin OS=Daucus carota PE=2 SV=1	DR0479	60.8	4e-09	COG0744	Membrane carboxypeptidase (penicillin-binding protein)	K01115	2e-69	261	bdi:100821936	phospholipase D [EC:3.1.4.4]	-	GO:0003824//catalytic activity	-	ko01100//Metabolic pathways;ko04144//Endocytosis;ko00565//Ether lipid metabolism;ko00564//Glycerophospholipid metabolism
CL112.Contig3_All	4339	678	1628	5.1244	12.6127	1.2994	Up	7.7132e-95	5.3648e-93	gi|357134466|ref|XP_003568838.1|	283.9	1e-74	PREDICTED: phospholipase D alpha 1-like isoform 2 [Brachypodium distachyon]	sp|Q43007|PLDA1_ORYSJ	1089	0	Phospholipase D alpha 1 OS=Oryza sativa subsp. japonica GN=PLD1 PE=1 SV=2	ECU11g1180	129	3e-33	COG1502	Phosphatidylserine/phosphatidylglycerophosphate/cardiolipin synthases and related enzymes	K01115	0	1162	osa:4337942	phospholipase D [EC:3.1.4.4]	GO:0009789//positive regulation of abscisic acid mediated signaling pathway;GO:0009845//seed germination;GO:0016042//lipid catabolic process;GO:0006643//membrane lipid metabolic process;GO:0046470//phosphatidylcholine metabolic process;GO:0010119//regulation of stomatal movement;GO:0046686//response to cadmium ion	GO:0005509//calcium ion binding;GO:0005546//phosphatidylinositol-4,5-bisphosphate binding;GO:0004630//phospholipase D activity;GO:0070290//NAPE-specific phospholipase D activity	GO:0005739//mitochondrion;GO:0009941//chloroplast envelope;GO:0030136//clathrin-coated vesicle;GO:0005634//nucleus;GO:0005886//plasma membrane	ko01100//Metabolic pathways;ko04144//Endocytosis;ko00565//Ether lipid metabolism;ko00564//Glycerophospholipid metabolism
CL3882.Contig2_All	418	62	22	4.8643	1.7693	-1.4591	Down	1.6379e-05	8.2139e-05	gi|357123932|ref|XP_003563661.1|	151	4e-36	PREDICTED: phospholipase D alpha 2-like [Brachypodium distachyon]	sp|P93844|PLDA2_ORYSJ	143	3e-35	Phospholipase D alpha 2 OS=Oryza sativa subsp. japonica GN=PLD2 PE=2 SV=2	--	--	--	--	--	K01115	8e-35	143	osa:4341469	phospholipase D [EC:3.1.4.4]	GO:0006643//membrane lipid metabolic process;GO:0016042//lipid catabolic process;GO:0046470//phosphatidylcholine metabolic process	GO:0070290//NAPE-specific phospholipase D activity;GO:0005509//calcium ion binding;GO:0004630//phospholipase D activity	GO:0016020//membrane	ko01100//Metabolic pathways;ko04144//Endocytosis;ko00565//Ether lipid metabolism;ko00564//Glycerophospholipid metabolism
Unigene32822_All	841	64	20	2.4957	0.7994	-1.6425	Down	1.8028e-06	1.0537e-05	gi|357123932|ref|XP_003563661.1|	517.7	7e-146	PREDICTED: phospholipase D alpha 2-like [Brachypodium distachyon]	sp|P93844|PLDA2_ORYSJ	499	1e-141	Phospholipase D alpha 2 OS=Oryza sativa subsp. japonica GN=PLD2 PE=2 SV=2	ECU11g1180	80.1	4e-15	COG1502	Phosphatidylserine/phosphatidylglycerophosphate/cardiolipin synthases and related enzymes	K01115	3e-141	499	osa:4341469	phospholipase D [EC:3.1.4.4]	GO:0009789//positive regulation of abscisic acid mediated signaling pathway;GO:0009845//seed germination;GO:0016042//lipid catabolic process;GO:0006643//membrane lipid metabolic process;GO:0046470//phosphatidylcholine metabolic process;GO:0010119//regulation of stomatal movement;GO:0046686//response to cadmium ion	GO:0005509//calcium ion binding;GO:0005546//phosphatidylinositol-4,5-bisphosphate binding;GO:0004630//phospholipase D activity;GO:0070290//NAPE-specific phospholipase D activity	GO:0005739//mitochondrion;GO:0009941//chloroplast envelope;GO:0030136//clathrin-coated vesicle;GO:0005634//nucleus;GO:0005886//plasma membrane	ko01100//Metabolic pathways;ko04144//Endocytosis;ko00565//Ether lipid metabolism;ko00564//Glycerophospholipid metabolism
Unigene7167_All	625	45	13	2.3612	0.6992	-1.7557	Down	2.8945e-05	0.00013906	gi|357123932|ref|XP_003563661.1|	388.3	4e-107	PREDICTED: phospholipase D alpha 2-like [Brachypodium distachyon]	sp|P93844|PLDA2_ORYSJ	362	9e-101	Phospholipase D alpha 2 OS=Oryza sativa subsp. japonica GN=PLD2 PE=2 SV=2	XF1267	57.8	1e-08	COG5297	Cellobiohydrolase A (1,4-beta-cellobiosidase A)	K01115	2e-100	362	osa:4341469	phospholipase D [EC:3.1.4.4]	GO:0009789//positive regulation of abscisic acid mediated signaling pathway;GO:0009845//seed germination;GO:0016042//lipid catabolic process;GO:0006643//membrane lipid metabolic process;GO:0046470//phosphatidylcholine metabolic process;GO:0010119//regulation of stomatal movement;GO:0046686//response to cadmium ion	GO:0005509//calcium ion binding;GO:0005546//phosphatidylinositol-4,5-bisphosphate binding;GO:0004630//phospholipase D activity;GO:0070290//NAPE-specific phospholipase D activity	GO:0005739//mitochondrion;GO:0009941//chloroplast envelope;GO:0030136//clathrin-coated vesicle;GO:0005634//nucleus;GO:0005886//plasma membrane	ko01100//Metabolic pathways;ko04144//Endocytosis;ko00565//Ether lipid metabolism;ko00564//Glycerophospholipid metabolism
CL3882.Contig1_All	356	55	21	5.0666	1.983	-1.3533	Down	0.00012757	0.00054173	gi|357123932|ref|XP_003563661.1|	219.6	1e-56	PREDICTED: phospholipase D alpha 2-like [Brachypodium distachyon]	sp|P93844|PLDA2_ORYSJ	199	3e-52	Phospholipase D alpha 2 OS=Oryza sativa subsp. japonica GN=PLD2 PE=2 SV=2	--	--	--	--	--	K01115	8e-52	199	osa:4341469	phospholipase D [EC:3.1.4.4]	GO:0009789//positive regulation of abscisic acid mediated signaling pathway;GO:0009845//seed germination;GO:0016042//lipid catabolic process;GO:0006643//membrane lipid metabolic process;GO:0046470//phosphatidylcholine metabolic process;GO:0010119//regulation of stomatal movement;GO:0046686//response to cadmium ion	GO:0005509//calcium ion binding;GO:0005546//phosphatidylinositol-4,5-bisphosphate binding;GO:0004630//phospholipase D activity;GO:0070290//NAPE-specific phospholipase D activity	GO:0005739//mitochondrion;GO:0009941//chloroplast envelope;GO:0030136//clathrin-coated vesicle;GO:0005634//nucleus;GO:0005886//plasma membrane	ko01100//Metabolic pathways;ko04144//Endocytosis;ko00565//Ether lipid metabolism;ko00564//Glycerophospholipid metabolism
Unigene2223_All	324	65	21	6.5792	2.1788	-1.5944	Down	2.4692e-06	1.41e-05	gi|357131960|ref|XP_003567601.1|	112.5	1e-24	PREDICTED: phospholipase D p1-like [Brachypodium distachyon]	sp|Q9M9W8|PLDP2_ARATH	65.5	7e-12	Phospholipase D p2 OS=Arabidopsis thaliana GN=PLDP2 PE=2 SV=2	--	--	--	--	--	K01115	1e-25	112	bdi:100836140	phospholipase D [EC:3.1.4.4]	GO:0031348//negative regulation of defense response;GO:0016036//cellular response to phosphate starvation;GO:0051788//response to misfolded protein;GO:0006635//fatty acid beta-oxidation;GO:0019375//galactolipid biosynthetic process;GO:0006995//cellular response to nitrogen starvation;GO:0009867//jasmonic acid mediated signaling pathway;GO:0043161//proteasomal ubiquitin-dependent protein catabolic…	GO:0004630//phospholipase D activity;GO:0035091//phosphatidylinositol binding	GO:0016023//cytoplasmic membrane-bounded vesicle;GO:0005773//vacuole;GO:0005634//nucleus	ko01100//Metabolic pathways;ko04144//Endocytosis;ko00565//Ether lipid metabolism;ko00564//Glycerophospholipid metabolism
JAZ
CL513.Contig5_All	850	217	998	8.3724	39.4689	2.237	Up	1.9507e-124	1.8633e-122	gi|357163188|ref|XP_003579652.1|	241.9	8e-63	PREDICTED: protein TIFY 9-like [Brachypodium distachyon]	sp|Q93ZM9|TIF9_ARATH	77	1e-14	Protein TIFY 9 OS=Arabidopsis thaliana GN=TIFY9 PE=1 SV=1	--	--	--	--	--	K13464	2e-18	90.9	rcu:RCOM_1437820	jasmonate ZIM domain-containing protein	GO:0009725//response to hormone stimulus;GO:0007165//signal transduction;GO:0006950//response to stress	-	-	ko04626//Plant-pathogen interaction;ko04075//Plant hormone signal transduction
CL513.Contig3_All	821	245	1026	9.7865	42.0095	2.1019	Up	2.4958e-118	2.2457e-116	gi|357163188|ref|XP_003579652.1|	230.3	2e-59	PREDICTED: protein TIFY 9-like [Brachypodium distachyon]	sp|Q93ZM9|TIF9_ARATH	74.3	8e-14	Protein TIFY 9 OS=Arabidopsis thaliana GN=TIFY9 PE=1 SV=1	--	--	--	--	--	K13464	8e-21	99	rcu:RCOM_1437820	jasmonate ZIM domain-containing protein	GO:0009725//response to hormone stimulus;GO:0007165//signal transduction;GO:0006950//response to stress	-	-	ko04626//Plant-pathogen interaction;ko04075//Plant hormone signal transduction
CL513.Contig2_All	944	280	930	9.7273	33.1172	1.7675	Up	1.5653e-85	9.8193e-84	gi|357163188|ref|XP_003579652.1|	227.3	2e-58	PREDICTED: protein TIFY 9-like [Brachypodium distachyon]	sp|Q93ZM9|TIF9_ARATH	77	1e-14	Protein TIFY 9 OS=Arabidopsis thaliana GN=TIFY9 PE=1 SV=1	--	--	--	--	--	K13464	2e-21	101	rcu:RCOM_1437820	jasmonate ZIM domain-containing protein	GO:0009725//response to hormone stimulus;GO:0007165//signal transduction;GO:0006950//response to stress	-	-	ko04626//Plant-pathogen interaction;ko04075//Plant hormone signal transduction
CL513.Contig1_All	960	179	610	6.1149	21.36	1.8045	Up	2.5768e-58	1.0992e-56	gi|357163188|ref|XP_003579652.1|	229.2	6e-59	PREDICTED: protein TIFY 9-like [Brachypodium distachyon]	sp|Q93ZM9|TIF9_ARATH	73.2	2e-13	Protein TIFY 9 OS=Arabidopsis thaliana GN=TIFY9 PE=1 SV=1	--	--	--	--	--	K13464	3e-19	94	rcu:RCOM_1437820	jasmonate ZIM domain-containing protein	GO:0009725//response to hormone stimulus;GO:0007165//signal transduction;GO:0006950//response to stress	-	-	ko04626//Plant-pathogen interaction;ko04075//Plant hormone signal transduction
CL513.Contig4_All	1263	163	393	4.2324	10.46	1.3053	Up	2.4539e-24	4.6823e-23	gi|357163188|ref|XP_003579652.1|	129.8	8e-29	PREDICTED: protein TIFY 9-like [Brachypodium distachyon]	sp|Q93ZM9|TIF9_ARATH	65.1	8e-11	Protein TIFY 9 OS=Arabidopsis thaliana GN=TIFY9 PE=1 SV=1	--	--	--	--	--	K13464	1e-11	69.3	rcu:RCOM_1437820	jasmonate ZIM domain-containing protein	GO:0010112//regulation of systemic acquired resistance;GO:2000022//regulation of jasmonic acid mediated signaling pathway;GO:0009628//response to abiotic stimulus;GO:0009611//response to wounding;GO:0009751//response to salicylic acid stimulus;GO:0009733//response to auxin stimulus	GO:0042803//protein homodimerization activity	GO:0005634//nucleus	ko04626//Plant-pathogen interaction;ko04075//Plant hormone signal transduction
CL15037.Contig1_All	1249	396	854	10.3978	22.9847	1.1444	Up	1.0042e-41	3.1309e-40	gi|357158589|ref|XP_003578176.1|	299.7	6e-80	PREDICTED: protein TIFY 10A-like [Brachypodium distachyon]	sp|Q9LMA8|TI10A_ARATH	105	5e-23	Protein TIFY 10A OS=Arabidopsis thaliana GN=TIFY10A PE=1 SV=1	--	--	--	--	--	K13464	2e-72	271	osa:4347164	jasmonate ZIM domain-containing protein	-	-	-	ko04626//Plant-pathogen interaction;ko04075//Plant hormone signal transduction
COI1
CL13823.Contig1_All	1395	36	136	0.8463	3.2772	1.9532	Up	1.2517e-15	1.5964e-14	gi|301318116|gb|ADK66973.1|	203	8e-51	coronatine insensitive 1-like protein [Triticum aestivum]	sp|O04197|COI1_ARATH	108	7e-24	Coronatine-insensitive protein 1 OS=Arabidopsis thaliana GN=COI1 PE=1 SV=1	DR2417m	50.8	6e-06	COG0595	Predicted hydrolase of the metallo-beta-lactamase superfamily	K13463	4e-47	187	sbi:SORBI_09g022040	coronatine-insensitive protein 1	GO:0010118//stomatal movement;GO:0009625//response to insect;GO:0031348//negative regulation of defense response;GO:0009867//jasmonic acid mediated signaling pathway;GO:0042742//defense response to bacterium;GO:0009611//response to wounding;GO:0009909//regulation of flower development;GO:0031146//SCF-dependent proteasomal ubiquitin-dependent protein catabolic process;GO:0009641//shade avoidance;G…	-	GO:0019005//SCF ubiquitin ligase complex	ko04626//Plant-pathogen interaction;ko04075//Plant hormone signal transduction
CL6692.Contig6_All	1768	66	169	1.2242	3.2133	1.3922	Up	2.4926e-12	2.5886e-11	gi|301318116|gb|ADK66973.1|	203	1e-50	coronatine insensitive 1-like protein [Triticum aestivum]	sp|O04197|COI1_ARATH	108	1e-23	Coronatine-insensitive protein 1 OS=Arabidopsis thaliana GN=COI1 PE=1 SV=1	DR2417m	50.8	7e-06	COG0595	Predicted hydrolase of the metallo-beta-lactamase superfamily	K13463	5e-47	187	sbi:SORBI_09g022040	coronatine-insensitive protein 1	GO:0010118//stomatal movement;GO:0009625//response to insect;GO:0031348//negative regulation of defense response;GO:0009867//jasmonic acid mediated signaling pathway;GO:0042742//defense response to bacterium;GO:0009611//response to wounding;GO:0009909//regulation of flower development;GO:0031146//SCF-dependent proteasomal ubiquitin-dependent protein catabolic process;GO:0009641//shade avoidance;G…	-	GO:0019005//SCF ubiquitin ligase complex	ko04626//Plant-pathogen interaction;ko04075//Plant hormone signal transduction
CL6692.Contig2_All	1741	53	120	0.9984	2.317	1.2146	Up	1.1309e-07	7.7058e-07	gi|301318116|gb|ADK66973.1|	203	1e-50	coronatine insensitive 1-like protein [Triticum aestivum]	sp|O04197|COI1_ARATH	108	1e-23	Coronatine-insensitive protein 1 OS=Arabidopsis thaliana GN=COI1 PE=1 SV=1	DR2417m	50.8	7e-06	COG0595	Predicted hydrolase of the metallo-beta-lactamase superfamily	K13463	5e-47	187	sbi:SORBI_09g022040	coronatine-insensitive protein 1	GO:0010118//stomatal movement;GO:0009625//response to insect;GO:0031348//negative regulation of defense response;GO:0009867//jasmonic acid mediated signaling pathway;GO:0042742//defense response to bacterium;GO:0009611//response to wounding;GO:0009909//regulation of flower development;GO:0031146//SCF-dependent proteasomal ubiquitin-dependent protein catabolic process;GO:0009641//shade avoidance;G…	-	GO:0019005//SCF ubiquitin ligase complex	ko04626//Plant-pathogen interaction;ko04075//Plant hormone signal transduction
Unigene18713_All	933	383	159	13.4624	5.7287	-1.2327	Down	2.7213e-21	4.5976e-20	gi|573914732|ref|XP_006645032.1|	417.5	1e-115	PREDICTED: coronatine-insensitive protein 1-like [Oryza brachyantha]	sp|O04197|COI1_ARATH	290	1e-78	Coronatine-insensitive protein 1 OS=Arabidopsis thaliana GN=COI1 PE=1 SV=1	--	--	--	--	--	K13463	4e-108	389	zma:100281510	coronatine-insensitive protein 1	GO:0010118//stomatal movement;GO:0009625//response to insect;GO:0031348//negative regulation of defense response;GO:0009867//jasmonic acid mediated signaling pathway;GO:0042742//defense response to bacterium;GO:0009611//response to wounding;GO:0009909//regulation of flower development;GO:0031146//SCF-dependent proteasomal ubiquitin-dependent protein catabolic process;GO:0009641//shade avoidance;G…	-	GO:0019005//SCF ubiquitin ligase complex	ko04626//Plant-pathogen interaction;ko04075//Plant hormone signal transduction
Unigene17090_All	598	255	119	13.9845	6.6894	-1.0639	Down	6.6232e-12	6.6663e-11	gi|357125904|ref|XP_003564629.1|	286.2	2e-76	PREDICTED: coronatine-insensitive protein 1-like [Brachypodium distachyon]	sp|O04197|COI1_ARATH	148	3e-36	Coronatine-insensitive protein 1 OS=Arabidopsis thaliana GN=COI1 PE=1 SV=1	--	--	--	--	--	K13463	2e-68	256	zma:100281510	coronatine-insensitive protein 1	GO:0010118//stomatal movement;GO:0009625//response to insect;GO:0031348//negative regulation of defense response;GO:0009867//jasmonic acid mediated signaling pathway;GO:0042742//defense response to bacterium;GO:0009611//response to wounding;GO:0009909//regulation of flower development;GO:0031146//SCF-dependent proteasomal ubiquitin-dependent protein catabolic process;GO:0009641//shade avoidance;G…	-	GO:0019005//SCF ubiquitin ligase complex	ko04626//Plant-pathogen interaction;ko04075//Plant hormone signal transduction
DREB
CL9452.Contig2_All	1188	1090	382	30.0896	10.8091	-1.477	Down	2.2698e-75	1.2398e-73	gi|404415273|gb|AFR67776.1|	362.8	5e-99	AP2 domain CBF protein [Triticum aestivum]	sp|Q6EP77|DRE1G_ORYSJ	352	2e-97	Dehydration-responsive element-binding protein 1G OS=Oryza sativa subsp. japonica GN=DREB1G PE=2 SV=1	--	--	--	--	--	K09286	1e-45	182	ath:AT4G25490	EREBP-like factor	GO:0009414//response to water deprivation;GO:0009631//cold acclimation;GO:0006355//regulation of transcription, DNA-dependent	GO:0003700//sequence-specific DNA binding transcription factor activity;GO:0003677//DNA binding	GO:0005634//nucleus	--
CL9452.Contig1_All	1218	1053	402	28.3523	11.0949	-1.3536	Down	4.2317e-64	1.9821e-62	gi|404415273|gb|AFR67776.1|	356.3	5e-97	AP2 domain CBF protein [Triticum aestivum]	sp|Q6EP77|DRE1G_ORYSJ	353	1e-97	Dehydration-responsive element-binding protein 1G OS=Oryza sativa subsp. japonica GN=DREB1G PE=2 SV=1	--	--	--	--	--	K09286	1e-44	178	ath:AT4G25480	EREBP-like factor	GO:0009414//response to water deprivation;GO:0009631//cold acclimation;GO:0006355//regulation of transcription, DNA-dependent	GO:0003700//sequence-specific DNA binding transcription factor activity;GO:0003677//DNA binding	GO:0005634//nucleus	--
CL1929.Contig6_All	1531	381	942	8.1612	20.6832	1.3416	Up	2.2906e-58	9.7935e-57	gi|197726109|gb|ACH73204.1|	495.7	7e-139	dehydration responsive element binding protein [Leymus chinensis]	sp|Q5W6R4|DRE2B_ORYSJ	373	1e-103	Dehydration-responsive element-binding protein 2B OS=Oryza sativa subsp. japonica GN=DREB2B PE=2 SV=2	--	--	--	--	--	K09286	1e-45	182	ath:AT5G05410	EREBP-like factor	GO:0006355//regulation of transcription, DNA-dependent	GO:0003700//sequence-specific DNA binding transcription factor activity;GO:0003677//DNA binding	GO:0005634//nucleus	--
CL1929.Contig2_All	2574	417	967	5.3129	12.6288	1.2491	Up	9.0938e-54	3.6215e-52	gi|385717732|gb|AFI71304.1|	33.1	3e-135	dehydration responsive element binding protein isoform c [Leymus chinensis]	sp|Q5W6R4|DRE2B_ORYSJ	354	1e-97	Dehydration-responsive element-binding protein 2B OS=Oryza sativa subsp. japonica GN=DREB2B PE=2 SV=2	--	--	--	--	--	K09286	2e-45	182	ath:AT5G05410	EREBP-like factor	GO:0006355//regulation of transcription, DNA-dependent	GO:0003700//sequence-specific DNA binding transcription factor activity;GO:0003677//DNA binding	GO:0005634//nucleus	--
CL1929.Contig8_All	1525	266	724	5.7203	15.9592	1.4802	Up	2.9954e-52	1.163e-50	gi|197726109|gb|ACH73204.1|	481.1	1e-134	dehydration responsive element binding protein [Leymus chinensis]	sp|Q5W6R4|DRE2B_ORYSJ	363	2e-100	Dehydration-responsive element-binding protein 2B OS=Oryza sativa subsp. japonica GN=DREB2B PE=2 SV=2	--	--	--	--	--	K09286	1e-46	185	ath:AT5G05410	EREBP-like factor	GO:0006351//transcription, DNA-dependent	-	-	--
CL1715.Contig3_All	1097	487	125	14.5589	3.8304	-1.9263	Down	1.2069e-49	4.4663e-48	gi|63098606|gb|AAY32553.1|	99.8	7e-90	CRT/DRE binding factor 3 [Triticum monococcum]	sp|Q0J3Y6|DRE1I_ORYSJ	154	2e-55	Dehydration-responsive element-binding protein 1I OS=Oryza sativa subsp. japonica GN=DREB1I PE=2 SV=1	Rv3876	50.1	7e-09	COG0455	ATPases involved in chromosome partitioning	K09286	3e-34	83.2	ath:AT4G25480	EREBP-like factor	GO:0006355//regulation of transcription, DNA-dependent	GO:0003700//sequence-specific DNA binding transcription factor activity;GO:0003677//DNA binding	GO:0005634//nucleus	--
CL1929.Contig5_All	1969	308	728	5.1299	12.4288	1.2767	Up	2.8941e-42	9.1379e-41	gi|331123571|gb|AEC53579.1|	474.2	3e-132	dehydration-responsive element binding protein 2A [Leymus chinensis]	sp|Q5W6R4|DRE2B_ORYSJ	354	9e-98	Dehydration-responsive element-binding protein 2B OS=Oryza sativa subsp. japonica GN=DREB2B PE=2 SV=2	--	--	--	--	--	K09286	1e-45	182	ath:AT5G05410	EREBP-like factor	GO:0006355//regulation of transcription, DNA-dependent	GO:0003700//sequence-specific DNA binding transcription factor activity;GO:0003677//DNA binding	GO:0005634//nucleus	--
CL1929.Contig9_All	1914	260	616	4.4549	10.8189	1.2801	Up	3.6458e-36	9.9513e-35	gi|331123571|gb|AEC53579.1|	458	2e-127	dehydration-responsive element binding protein 2A [Leymus chinensis]	sp|Q5W6R4|DRE2B_ORYSJ	342	3e-94	Dehydration-responsive element-binding protein 2B OS=Oryza sativa subsp. japonica GN=DREB2B PE=2 SV=2	--	--	--	--	--	K09286	2e-46	186	ath:AT5G05410	EREBP-like factor	GO:0006351//transcription, DNA-dependent	-	-	--
CL13869.Contig1_All	518	134	268	8.4836	17.3919	1.0357	Up	2.8752e-12	2.9719e-11	gi|357131143|ref|XP_003567200.1|	201.4	4e-51	PREDICTED: dehydration-responsive element-binding protein 2F-like [Brachypodium distachyon]	sp|Q94ID6|ERF81_ARATH	88.2	2e-18	Ethylene-responsive transcription factor 12 OS=Arabidopsis thaliana GN=ERF12 PE=2 SV=1	--	--	--	--	--	K09286	5e-17	85.1	sbi:SORBI_04g006080	EREBP-like factor	GO:0006355//regulation of transcription, DNA-dependent	GO:0003700//sequence-specific DNA binding transcription factor activity;GO:0003677//DNA binding	GO:0005634//nucleus	--
CL9211.Contig1_All	651	170	68	8.564	3.5113	-1.2863	Down	7.2869e-11	6.7766e-10	gi|37694048|gb|AAQ98965.1|	226.5	2e-58	putative DRE-binding protein DREB1 [Festuca arundinacea]	sp|Q8GUW4|DRE1B_ORYSI	204	3e-53	Dehydration-responsive element-binding protein 1B OS=Oryza sativa subsp. indica GN=DREB1B PE=2 SV=1	DR0479	62.4	6e-10	COG0744	Membrane carboxypeptidase (penicillin-binding protein)	K09286	3e-28	123	ath:AT4G25480	EREBP-like factor	GO:0006351//transcription, DNA-dependent	-	-	--
CL9211.Contig2_All	590	40	9	2.2234	0.5128	-2.1163	Down	8.3587e-06	4.4095e-05	gi|117653921|gb|ABK55376.1|	208.8	3e-53	CBFIVb-B20 [Triticum aestivum]	sp|Q8GUW4|DRE1B_ORYSI	196	8e-51	Dehydration-responsive element-binding protein 1B OS=Oryza sativa subsp. indica GN=DREB1B PE=2 SV=1	DR0479	61.2	1e-09	COG0744	Membrane carboxypeptidase (penicillin-binding protein)	K09286	3e-28	122	ath:AT4G25480	EREBP-like factor	GO:0006351//transcription, DNA-dependent	-	-	--
NCED
CL8856.Contig4_All	2314	1361	2700	19.2886	39.2232	1.024	Up	3.7807e-107	2.9774e-105	gi|514724394|ref|XP_004955480.1|	950.7	0	PREDICTED: 9-cis-epoxycarotenoid dioxygenase 1, chloroplastic-like [Setaria italica]	sp|O24592|NCED1_MAIZE	782	0	9-cis-epoxycarotenoid dioxygenase 1, chloroplastic OS=Zea mays GN=VP14 PE=1 SV=2	all1106	265	3e-70	COG3670	Lignostilbene-alpha,beta-dioxygenase and related enzymes	K09840	0	950	zma:100281391	9-cis-epoxycarotenoid dioxygenase [EC:1.13.11.51]	GO:0006950//response to stress;GO:0009688//abscisic acid biosynthetic process;GO:0055114//oxidation-reduction process	GO:0046872//metal ion binding;GO:0045549//9-cis-epoxycarotenoid dioxygenase activity	GO:0009570//chloroplast stroma	ko01110//Biosynthesis of secondary metabolites;ko01100//Metabolic pathways;ko00906//Carotenoid biosynthesis
CL8856.Contig1_All	505	174	460	11.2996	30.6203	1.4382	Up	1.8731e-32	4.6199e-31	gi|357119480|ref|XP_003561467.1|	194.5	5e-49	PREDICTED: 9-cis-epoxycarotenoid dioxygenase 1, chloroplastic-like [Brachypodium distachyon]	sp|O24592|NCED1_MAIZE	162	7e-41	9-cis-epoxycarotenoid dioxygenase 1, chloroplastic OS=Zea mays GN=VP14 PE=1 SV=2	all1106	76.3	2e-14	COG3670	Lignostilbene-alpha,beta-dioxygenase and related enzymes	K09840	6e-50	194	zma:100281391	9-cis-epoxycarotenoid dioxygenase [EC:1.13.11.51]	GO:0008152//metabolic process	GO:0016702//oxidoreductase activity, acting on single donors with incorporation of molecular oxygen, incorporation of two atoms of oxygen	GO:0009507//chloroplast	ko01110//Biosynthesis of secondary metabolites;ko01100//Metabolic pathways;ko00906//Carotenoid biosynthesis
CL12565.Contig1_All	453	26	85	1.8823	6.3076	1.7446	Up	5.1486e-09	4.0625e-08	gi|357161535|ref|XP_003579121.1|	115.2	2e-25	PREDICTED: 9-cis-epoxycarotenoid dioxygenase 1, chloroplastic-like [Brachypodium distachyon]	sp|O24592|NCED1_MAIZE	78.2	2e-15	9-cis-epoxycarotenoid dioxygenase 1, chloroplastic OS=Zea mays GN=VP14 PE=1 SV=2	--	--	--	--	--	K09840	3e-26	115	bdi:100835478	9-cis-epoxycarotenoid dioxygenase [EC:1.13.11.51]	-	-	GO:0009536//plastid	ko01110//Biosynthesis of secondary metabolites;ko01100//Metabolic pathways;ko00906//Carotenoid biosynthesis
CL1476.Contig1_All	769	83	163	3.5396	7.1253	1.0094	Up	9.9547e-08	6.822e-07	gi|514755111|ref|XP_004963201.1|	190.3	2e-47	predicted protein [Hordeum vulgare subsp. vulgare]	sp|O24592|NCED1_MAIZE	189	2e-48	9-cis-epoxycarotenoid dioxygenase 1, chloroplastic OS=Zea mays GN=VP14 PE=1 SV=2	all1106	83.2	4e-16	COG3670	Lignostilbene-alpha,beta-dioxygenase and related enzymes	K09840	5e-48	189	zma:732819	9-cis-epoxycarotenoid dioxygenase [EC:1.13.11.51]	GO:0006950//response to stress;GO:0009688//abscisic acid biosynthetic process;GO:0055114//oxidation-reduction process	GO:0046872//metal ion binding;GO:0045549//9-cis-epoxycarotenoid dioxygenase activity	GO:0009570//chloroplast stroma	ko01110//Biosynthesis of secondary metabolites;ko01100//Metabolic pathways;ko00906//Carotenoid biosynthesis
Dehydrin
CL4123.Contig1_All	1311	5825	14155	145.714	362.953	1.3166	Up	0	0	gi|570295562|gb|AHE74132.1|	378.6	1e-103	dehydrin [Stipa purpurea]	sp|P46524|CO410_WHEAT	378	4e-105	Dehydrin COR410 OS=Triticum aestivum GN=COR410 PE=2 SV=1	DR2133	52.8	1e-06	COG4372	Uncharacterized protein conserved in bacteria with the myosin-like domain	K14325	2e-08	58.9	osa:4325394	RNA-binding protein with serine-rich domain 1	GO:0009415//response to water stimulus;GO:0006950//response to stress	-	-	ko03015//mRNA surveillance pathway;ko03013//RNA transport;ko03008//Ribosome biogenesis in eukaryotes
CL4123.Contig2_All	1105	2079	5657	61.7019	172.094	1.4798	Up	0	0	gi|1657845|gb|AAB18202.1|	241.1	2e-62	cold acclimation protein WCOR410c [Triticum aestivum]	sp|P46524|CO410_WHEAT	215	3e-56	Dehydrin COR410 OS=Triticum aestivum GN=COR410 PE=2 SV=1	Cgl1939	51.6	2e-06	COG0532	Translation initiation factor 2 (IF-2; GTPase)	K01051	2e-08	58.2	gmx:100776781	pectinesterase [EC:3.1.1.11]	-	-	-	ko03015//mRNA surveillance pathway;ko03013//RNA transport;ko01100//Metabolic pathways;ko00040//Pentose and glucuronate interconversions;ko00500//Starch and sucrose metabolism
CL4123.Contig3_All	1406	2052	8034	47.8629	192.083	2.0048	Up	0	0	gi|570295562|gb|AHE74132.1|	364.8	1e-99	dehydrin [Stipa purpurea]	sp|P46524|CO410_WHEAT	364	6e-101	Dehydrin COR410 OS=Triticum aestivum GN=COR410 PE=2 SV=1	DR2133	52.4	2e-06	COG4372	Uncharacterized protein conserved in bacteria with the myosin-like domain	K13171	9e-08	56.6	mtr:MTR_4g064740	serine/arginine repetitive matrix protein 1	GO:0050896//response to stimulus	-	-	ko03015//mRNA surveillance pathway;ko03013//RNA transport
CL4123.Contig4_All	1367	1801	6695	43.2068	164.636	1.93	Up	0	0	gi|1169018|sp|P46524.1|CO410_WHEAT	369.8	5e-101	RecName: Full=Dehydrin COR410; AltName: Full=Cold-induced COR410 protein >gi|457389|gb|AAA20189.1| cold acclimation protein [Triticum aestivum] >gi|157153570|gb|ABV24865.1| dehydrin WZY1-2 [Triticum aestivum]	sp|P46524|CO410_WHEAT	369	2e-102	Dehydrin COR410 OS=Triticum aestivum GN=COR410 PE=2 SV=1	--	--	--	--	--	K13171	7e-08	57	rcu:RCOM_0733150	serine/arginine repetitive matrix protein 1	GO:0050896//response to stimulus	-	-	ko03015//mRNA surveillance pathway;ko03013//RNA transport
CL5735.Contig3_All	912	1587	3781	57.0675	139.365	1.2881	Up	8.9982e-215	1.6163e-212	gi|357142368|ref|XP_003572548.1|	238.8	7e-62	PREDICTED: dehydrin DHN3-like [Brachypodium distachyon]	sp|P12948|DHN3_HORVU	223	2e-58	Dehydrin DHN3 OS=Hordeum vulgare GN=DHN3 PE=2 SV=1	--	--	--	--	--	--	--	--	--	--	GO:0050896//response to stimulus	-	-	--
Unigene15994_All	788	504	1942	20.9754	82.8449	1.9817	Up	5.7619e-206	9.8274e-204	gi|61657604|emb|CAI65403.1|	274.6	1e-72	dehydrin [Triticum durum]	sp|P46518|LEA14_GOSHI	213	1e-55	Late embryogenesis abundant protein Lea14-A OS=Gossypium hirsutum GN=LEA14-A PE=2 SV=1	--	--	--	--	--	K12878	2e-08	57.4	olu:OSTLU_14373	THO complex subunit 1	GO:0009611//response to wounding;GO:0050832//defense response to fungus;GO:0009644//response to high light intensity;GO:0009269//response to desiccation	-	GO:0005886//plasma membrane	ko03015//mRNA surveillance pathway;ko03013//RNA transport;ko01110//Biosynthesis of secondary metabolites;ko01100//Metabolic pathways;ko00900//Terpenoid backbone biosynthesis;ko03040//Spliceosome
CL5735.Contig2_All	741	958	2269	42.3988	102.934	1.2796	Up	2.2556e-128	2.2428e-126	gi|357117776|ref|XP_003560638.1|	299.3	3e-80	PREDICTED: dehydrin DHN3-like [Brachypodium distachyon]	sp|P12948|DHN3_HORVU	288	2e-78	Dehydrin DHN3 OS=Hordeum vulgare GN=DHN3 PE=2 SV=1	XF0818	49.3	7e-06	COG2730	Endoglucanase	K12741	6e-06	49.3	osa:4328758	heterogeneous nuclear ribonucleoprotein A1/A3	GO:0009415//response to water stimulus;GO:0006950//response to stress	-	-	ko03040//Spliceosome
Unigene33265_All	894	104	12	3.8151	0.4512	-3.0799	Down	3.2602e-19	5.0287e-18	gi|429503484|gb|AFZ93514.1|	56.6	5e-07	dehydrin-like protein 2b [Alternaria brassicicola]	sp|P46526|CS66_WHEAT	78.6	5e-15	Cold shock protein CS66 OS=Triticum aestivum GN=CS66 PE=2 SV=1	MT0370	82	1e-15	COG5651	PPE-repeat proteins	K14411	2e-09	61.6	gmx:100786882	RNA-binding protein Musashi	-	-	-	ko03015//mRNA surveillance pathway;ko03013//RNA transport;ko03040//Spliceosome
CL5735.Contig1_All	579	187	384	10.5918	22.2944	1.0737	Up	7.0747e-18	1.024e-16	gi|357142368|ref|XP_003572548.1|	137.5	1e-31	PREDICTED: dehydrin DHN3-like [Brachypodium distachyon]	sp|P12948|DHN3_HORVU	132	2e-31	Dehydrin DHN3 OS=Hordeum vulgare GN=DHN3 PE=2 SV=1	--	--	--	--	--	--	--	--	--	--	GO:0009415//response to water stimulus;GO:0006950//response to stress	-	-	--
CL6328.Contig1_All	440	0	30	0	2.292	11.1624	Up	6.3337e-10	5.4249e-09	gi|429503483|gb|AFZ93513.1|	50.4	8e-06	dehydrin-like protein 2a [Alternaria brassicicola]	sp|Q07322|ECP40_DAUCA	47.4	3e-06	Embryogenic cell protein 40 OS=Daucus carota GN=ECP40 PE=1 SV=1	--	--	--	--	--	K14411	4e-06	48.5	zma:100280293	RNA-binding protein Musashi	-	-	-	ko03015//mRNA surveillance pathway
Unigene26791_All	615	52	7	2.7729	0.3826	-2.8575	Down	1.3533e-09	1.1272e-08	gi|255580168|ref|XP_002530915.1|	69.3	4e-11	RNA binding protein, putative [Ricinus communis] >gi|223529509|gb|EEF31464.1| RNA binding protein, putative [Ricinus communis]	sp|P28641|DHN3_PEA	51.2	4e-07	Dehydrin DHN3 OS=Pisum sativum GN=DHN3 PE=2 SV=1	XF1267	55.1	9e-08	COG5297	Cellobiohydrolase A (1,4-beta-cellobiosidase A)	K11292	5e-08	55.8	vvi:100254333	transcription elongation factor SPT6	-	-	GO:0005737//cytoplasm	ko03015//mRNA surveillance pathway
Unigene33266_All	209	18	1	2.8244	0.1608	-4.1346	Down	5.0018e-05	0.00023057	gi|429503484|gb|AFZ93514.1|	50.4	8e-06	dehydrin-like protein 2b [Alternaria brassicicola]	sp|P46526|CS66_WHEAT	48.9	7e-07	Cold shock protein CS66 OS=Triticum aestivum GN=CS66 PE=2 SV=1	--	--	--	--	--	--	--	--	--	--	-	-	-	--
LEA
Unigene15689_All	953	47	1712	1.6174	60.3884	5.2225	Up	0	0	gi|288816940|gb|ADC55280.1|	285.4	8e-76	LEA3 protein [Ampelocalamus calcareus]	sp|A2Y720|LEA3_ORYSI	265	2e-71	Late embryogenesis abundant protein, group 3 OS=Oryza sativa subsp. indica GN=LEA3 PE=1 SV=1	DR0479	81.3	2e-15	COG0744	Membrane carboxypeptidase (penicillin-binding protein)	K14325	3e-16	84	ppp:PHYPADRAFT_166555	RNA-binding protein with serine-rich domain 1	-	-	-	ko03015//mRNA surveillance pathway;ko03013//RNA transport
Unigene24764_All	813	921	6717	37.1514	277.733	2.9022	Up	0	0	gi|357128306|ref|XP_003565815.1|	270.8	1e-71	PREDICTED: late embryogenesis abundant protein Lea14-A-like [Brachypodium distachyon]	sp|P46518|LEA14_GOSHI	209	2e-54	Late embryogenesis abundant protein Lea14-A OS=Gossypium hirsutum GN=LEA14-A PE=2 SV=1	--	--	--	--	--	K12878	4e-07	53.5	olu:OSTLU_14373	THO complex subunit 1	GO:0009611//response to wounding;GO:0050832//defense response to fungus;GO:0009644//response to high light intensity;GO:0009269//response to desiccation	-	GO:0005886//plasma membrane	ko03015//mRNA surveillance pathway;ko03013//RNA transport;ko01110//Biosynthesis of secondary metabolites;ko01100//Metabolic pathways;ko00900//Terpenoid backbone biosynthesis;ko03040//Spliceosome
Unigene22261_All	712	468	2240	21.5562	105.757	2.2946	Up	1.1836e-285	2.9253e-283	gi|115436230|ref|NP_001042873.1|	133.3	3e-30	Os01g0314800 [Oryza sativa Japonica Group] >gi|113532404|dbj|BAF04787.1| Os01g0314800 [Oryza sativa Japonica Group]	sp|Q39644|LEA5_CITSI	54.3	7e-08	Late embryogenesis abundant protein Lea5 OS=Citrus sinensis GN=LEA5 PE=2 SV=1	--	--	--	--	--	--	--	--	--	--	-	-	GO:0005739//mitochondrion	--
Unigene9383_All	755	398	1165	17.2879	51.8707	1.5852	Up	1.3115e-91	8.7983e-90	gi|514772517|ref|XP_004967515.1|	134.8	1e-30	PREDICTED: late embryogenesis abundant protein Lea5-like [Setaria italica]	sp|Q39644|LEA5_CITSI	55.5	3e-08	Late embryogenesis abundant protein Lea5 OS=Citrus sinensis GN=LEA5 PE=2 SV=1	--	--	--	--	--	--	--	--	--	--	GO:0048519//negative regulation of biological process;GO:0051707//response to other organism;GO:0042631//cellular response to water deprivation;GO:0009755//hormone-mediated signaling pathway;GO:0043067//regulation of programmed cell death;GO:0000302//response to reactive oxygen species;GO:0009409//response to cold;GO:0031347//regulation of defense response;GO:0045087//innate immune response	-	GO:0005739//mitochondrion	--
CL3750.Contig1_All	769	352	866	15.0115	37.856	1.3345	Up	2.2534e-53	8.8954e-52	gi|357132418|ref|XP_003567827.1|	283.5	2e-75	PREDICTED: late embryogenesis abundant protein Lea14-A-like [Brachypodium distachyon]	sp|P46518|LEA14_GOSHI	200	6e-52	Late embryogenesis abundant protein Lea14-A OS=Gossypium hirsutum GN=LEA14-A PE=2 SV=1	--	--	--	--	--	--	--	--	--	--	GO:0009611//response to wounding;GO:0050832//defense response to fungus;GO:0009644//response to high light intensity;GO:0009269//response to desiccation	-	GO:0005886//plasma membrane	--
CL6420.Contig4_All	423	35	155	2.7135	12.3178	2.1825	Up	4.2964e-20	6.9072e-19	gi|357136094|ref|XP_003569641.1|	171.4	3e-42	PREDICTED: late embryogenesis abundant protein, group 3-like [Brachypodium distachyon]	sp|A2Y720|LEA3_ORYSI	120	3e-28	Late embryogenesis abundant protein, group 3 OS=Oryza sativa subsp. indica GN=LEA3 PE=1 SV=1	--	--	--	--	--	K14325	1e-08	56.6	vvi:100267894	RNA-binding protein with serine-rich domain 1	-	-	-	ko03015//mRNA surveillance pathway;ko03013//RNA transport
Unigene40633_All	286	0	50	0	5.8769	12.5208	Up	4.7101e-16	6.1533e-15	gi|56744226|gb|AAW28553.1|	54.3	5e-07	At3g17520 [Arabidopsis thaliana]	sp|Q03968|LEA3_WHEAT	55.1	9e-09	Late embryogenesis abundant protein, group 3 OS=Triticum aestivum PE=2 SV=1	--	--	--	--	--	--	--	--	--	--	-	-	-	--
CL13505.Contig3_All	693	32	123	1.5143	5.9664	1.9782	Up	1.7364e-14	2.0662e-13	gi|357134325|ref|XP_003568768.1|	83.2	2e-58	PREDICTED: 18 kDa seed maturation protein-like [Brachypodium distachyon]	sp|P46515|LEA11_HELAN	80.9	6e-16	11 kDa late embryogenesis abundant protein OS=Helianthus annuus PE=2 SV=1	--	--	--	--	--	K14325	4e-07	53.1	pop:POPTR_823076	RNA-binding protein with serine-rich domain 1	GO:0009790//embryo development	-	-	ko03015//mRNA surveillance pathway;ko03013//RNA transport
Unigene19508_All	1154	171	81	4.8596	2.3595	-1.0424	Down	3.308e-08	2.3956e-07	gi|34394536|dbj|BAC83841.1|	575.9	3e-163	late embryogenesis abundant proteins-like [Oryza sativa Japonica Group]	sp|P46518|LEA14_GOSHI	97.8	1e-20	Late embryogenesis abundant protein Lea14-A OS=Gossypium hirsutum GN=LEA14-A PE=2 SV=1	--	--	--	--	--	--	--	--	--	--	GO:0046686//response to cadmium ion;GO:0009269//response to desiccation	-	GO:0005886//plasma membrane	--
Unigene46117_All	243	0	22	0	3.0434	11.5715	Up	1.7911e-07	1.1911e-06	gi|357128633|ref|XP_003565975.1|	76.3	1e-13	PREDICTED: LOW QUALITY PROTEIN: late embryogenesis abundant protein, group 3-like [Brachypodium distachyon]	sp|P0C5A4|LEA3_ORYSJ	69.3	5e-13	Late embryogenesis abundant protein, group 3 OS=Oryza sativa subsp. japonica GN=LEA3 PE=2 SV=1	--	--	--	--	--	--	--	--	--	--	-	-	-	--
CL6420.Contig2_All	735	53	106	2.3648	4.848	1.0357	Up	1.1714e-05	6.0281e-05	gi|357136094|ref|XP_003569641.1|	281.6	7e-75	PREDICTED: late embryogenesis abundant protein, group 3-like [Brachypodium distachyon]	sp|A2Y720|LEA3_ORYSI	175	2e-44	Late embryogenesis abundant protein, group 3 OS=Oryza sativa subsp. indica GN=LEA3 PE=1 SV=1	DR0479	62	1e-09	COG0744	Membrane carboxypeptidase (penicillin-binding protein)	K13171	1e-13	74.7	rcu:RCOM_0733150	serine/arginine repetitive matrix protein 1	-	-	-	ko03015//mRNA surveillance pathway;ko03013//RNA transport
Unigene8570_All	315	6	30	0.6247	3.2015	2.3575	Up	3.0051e-05	0.00014413	gi|357132418|ref|XP_003567827.1|	124	5e-28	PREDICTED: late embryogenesis abundant protein Lea14-A-like [Brachypodium distachyon]	sp|P46518|LEA14_GOSHI	109	3e-25	Late embryogenesis abundant protein Lea14-A OS=Gossypium hirsutum GN=LEA14-A PE=2 SV=1	--	--	--	--	--	--	--	--	--	--	GO:0009611//response to wounding;GO:0050832//defense response to fungus;GO:0009644//response to high light intensity;GO:0009269//response to desiccation	-	GO:0005886//plasma membrane	--

## Sheet: genes related to defense
A summary of the genes related to defense
gene ID	geneLength	FS_rawfragments	OS_rawfragments	FS_FPKM	OS_FPKM	log2(OS_FPKM/FS_FPKM)	up/down	pvalue	FDR	Nr-ID	Nr-Score	Nr-Evalue	Nr-annotation	Swissprot-ID	Swissprot-Score	Swissprot-Evalue	Swissprot-annotation	COG-Protein-or-Domain	COG-Score	COG-Evalue	COG-ID	COG-Function-Description	KO_id	KEGG-Evalue	KEGG-Score	KEGG-Gene	ko_definition	GO-BiologicalProcess	GO-MolecularFunction	Go-CellularComponent	Pathway ID//Pathway
PR1
Unigene6840_All	769	167	432	7.1219	18.8843	1.4069	Up	1.2483e-29	2.8384e-28	gi|474305749|gb|EMS61770.1|	315.5	5e-85	Pathogenesis-related protein 1 [Triticum urartu]	sp|P35792|PR12_HORVU	312	2e-85	Pathogenesis-related protein PRB1-2 OS=Hordeum vulgare PE=2 SV=1	YJL078c_1	101	1e-21	COG2340	Uncharacterized protein with SCP/PR1 domains	K13449	3e-53	206	vvi:100258414	pathogenesis-related protein 1	-	-	GO:0005576//extracellular region;GO:0016023//cytoplasmic membrane-bounded vesicle	ko04626//Plant-pathogen interaction;ko03015//mRNA surveillance pathway;ko03013//RNA transport;ko04075//Plant hormone signal transduction
Unigene2461_All	342	33	73	3.1644	7.1753	1.1811	Up	5.3929e-05	0.00024605	gi|573951940|ref|XP_006658248.1|	90.9	5e-18	PREDICTED: pathogenesis-related protein PRB1-2-like [Oryza brachyantha]	sp|P35793|PR13_HORVU	76.6	3e-15	Pathogenesis-related protein PRB1-3 OS=Hordeum vulgare PE=2 SV=1	YJL078c_1	50.8	6e-07	COG2340	Uncharacterized protein with SCP/PR1 domains	K13449	4e-12	67.8	pop:POPTR_175615	pathogenesis-related protein 1	-	-	GO:0005576//extracellular region;GO:0016023//cytoplasmic membrane-bounded vesicle	ko04626//Plant-pathogen interaction;ko04075//Plant hormone signal transduction
FLS2
Unigene43887_All	215	1	16	0.1525	2.5016	4.036	Up	0.00011863	0.00050637	gi|357168495|ref|XP_003581675.1|	50.8	6e-06	PREDICTED: LRR receptor-like serine/threonine-protein kinase FLS2-like [Brachypodium distachyon]	sp|Q8VZG8|Y4885_ARATH	73.9	2e-14	Probable LRR receptor-like serine/threonine-protein kinase At4g08850 OS=Arabidopsis thaliana GN=At4g08850 PE=1 SV=3	MA2301_1	47.8	5e-06	COG4886	Leucine-rich repeat (LRR) protein	K13420	5e-23	103	sbi:SORBI_06g028760	LRR receptor-like serine/threonine-protein kinase FLS2 [EC:2.7.11.1]	GO:0006468//protein phosphorylation	GO:0005524//ATP binding;GO:0004674//protein serine/threonine kinase activity	GO:0016023//cytoplasmic membrane-bounded vesicle;GO:0016020//membrane	ko04626//Plant-pathogen interaction
Unigene43888_All	583	8	53	0.45	3.056	2.7636	Up	9.5967e-10	8.0973e-09	gi|514824061|ref|XP_004986689.1|	55.1	7e-07	PREDICTED: LRR receptor-like serine/threonine-protein kinase FLS2-like [Setaria italica]	sp|Q9FL28|FLS2_ARATH	178	2e-45	LRR receptor-like serine/threonine-protein kinase FLS2 OS=Arabidopsis thaliana GN=FLS2 PE=1 SV=1	MA2301_1	79.3	4e-15	COG4886	Leucine-rich repeat (LRR) protein	K13420	9e-75	277	sbi:SORBI_06g028760	LRR receptor-like serine/threonine-protein kinase FLS2 [EC:2.7.11.1]	GO:0006468//protein phosphorylation	GO:0005524//ATP binding;GO:0004674//protein serine/threonine kinase activity	GO:0016023//cytoplasmic membrane-bounded vesicle	ko04626//Plant-pathogen interaction
Unigene12048_All	623	12	71	0.6317	3.831	2.6004	Up	6.5637e-12	6.6092e-11	gi|475459637|gb|EMT01985.1|	303.9	1e-81	LRR receptor-like serine/threonine-protein kinase FLS2 [Aegilops tauschii]	sp|Q9FL28|FLS2_ARATH	183	7e-47	LRR receptor-like serine/threonine-protein kinase FLS2 OS=Arabidopsis thaliana GN=FLS2 PE=1 SV=1	sll1575	66.6	3e-11	COG0515	Serine/threonine protein kinase	K13420	1e-82	303	sbi:SORBI_06g028760	LRR receptor-like serine/threonine-protein kinase FLS2 [EC:2.7.11.1]	GO:0009813//flavonoid biosynthetic process;GO:0016045//detection of bacterium;GO:0052544//defense response by callose deposition in cell wall;GO:0042742//defense response to bacterium;GO:0007169//transmembrane receptor protein tyrosine kinase signaling pathway;GO:0006468//protein phosphorylation;GO:0010359//regulation of anion channel activity	GO:0005515//protein binding;GO:0004675//transmembrane receptor protein serine/threonine kinase activity;GO:0045431//flavonol synthase activity;GO:0005524//ATP binding	GO:0016023//cytoplasmic membrane-bounded vesicle;GO:0005886//plasma membrane	ko04626//Plant-pathogen interaction
Unigene2737_All	1537	31	172	0.6614	3.7618	2.5078	Up	6.9865e-26	1.4027e-24	gi|474357533|gb|EMS63184.1|	68.9	2e-10	LRR receptor-like serine/threonine-protein kinase FLS2 [Triticum urartu]	sp|Q9FL28|FLS2_ARATH	428	5e-120	LRR receptor-like serine/threonine-protein kinase FLS2 OS=Arabidopsis thaliana GN=FLS2 PE=1 SV=1	MA2301_1	102	2e-21	COG4886	Leucine-rich repeat (LRR) protein	K13420	0	734	sbi:SORBI_06g028760	LRR receptor-like serine/threonine-protein kinase FLS2 [EC:2.7.11.1]	GO:0006468//protein phosphorylation	GO:0005524//ATP binding;GO:0004674//protein serine/threonine kinase activity	GO:0016023//cytoplasmic membrane-bounded vesicle	ko04626//Plant-pathogen interaction
Unigene11377_All	433	7	31	0.5302	2.4067	2.1824	Up	5.1121e-05	0.00023457	gi|573942782|ref|XP_006653775.1|	51.2	4e-06	PREDICTED: LRR receptor-like serine/threonine-protein kinase FLS2-like [Oryza brachyantha]	sp|Q9FL28|FLS2_ARATH	141	1e-34	LRR receptor-like serine/threonine-protein kinase FLS2 OS=Arabidopsis thaliana GN=FLS2 PE=1 SV=1	MA2301_1	62.8	2e-10	COG4886	Leucine-rich repeat (LRR) protein	K13420	8e-56	213	osa:4337016	LRR receptor-like serine/threonine-protein kinase FLS2 [EC:2.7.11.1]	GO:0006468//protein phosphorylation	GO:0005524//ATP binding;GO:0004674//protein serine/threonine kinase activity	GO:0016023//cytoplasmic membrane-bounded vesicle	ko04626//Plant-pathogen interaction
CL3221.Contig2_All	886	33	104	1.2215	3.9459	1.6917	Up	2.4504e-10	2.177e-09	gi|475533860|gb|EMT08468.1|	54.7	2e-06	LRR receptor-like serine/threonine-protein kinase FLS2 [Aegilops tauschii]	sp|Q9FIZ3|GSO2_ARATH	102	4e-22	LRR receptor-like serine/threonine-protein kinase GSO2 OS=Arabidopsis thaliana GN=GSO2 PE=2 SV=2	MA2301_1	68.2	2e-11	COG4886	Leucine-rich repeat (LRR) protein	K13420	2e-23	107	pop:POPTR_1075175	LRR receptor-like serine/threonine-protein kinase FLS2 [EC:2.7.11.1]	-	-	GO:0016023//cytoplasmic membrane-bounded vesicle	ko04626//Plant-pathogen interaction
WRKY4
CL9110.Contig3_All	1233	560	217	14.8947	5.9162	-1.3321	Down	4.4043e-34	1.1338e-32	gi|357115918|ref|XP_003559732.1|	77.4	4e-13	PREDICTED: probable WRKY transcription factor 4-like [Brachypodium distachyon]	sp|Q9XI90|WRKY4_ARATH	240	1e-63	Probable WRKY transcription factor 4 OS=Arabidopsis thaliana GN=WRKY4 PE=1 SV=2	Rv3876	77.8	4e-14	COG0455	ATPases involved in chromosome partitioning	K13424	3e-36	150	zma:100281558	WRKY transcription factor 33	GO:0006355//regulation of transcription, DNA-dependent	GO:0003700//sequence-specific DNA binding transcription factor activity;GO:0043565//sequence-specific DNA binding	-	ko04626//Plant-pathogen interaction
WRKY46
CL6991.Contig2_All	819	63	173	2.5227	7.1008	1.493	Up	8.0819e-14	9.2486e-13	gi|474357754|gb|EMS63204.1|	41.6	1e-103	putative WRKY transcription factor 46 [Triticum urartu]	sp|Q9SKD9|WRK46_ARATH	82	4e-16	Probable WRKY transcription factor 46 OS=Arabidopsis thaliana GN=WRKY46 PE=2 SV=1	--	--	--	--	--	K13425	5e-09	59.7	rcu:RCOM_1616660	WRKY transcription factor 22	-	-	GO:0009536//plastid	ko04626//Plant-pathogen interaction
CL6991.Contig1_All	724	94	307	4.2579	14.2542	1.7432	Up	7.9381e-29	1.7532e-27	gi|474357754|gb|EMS63204.1|	393.3	1e-108	putative WRKY transcription factor 46 [Triticum urartu]	sp|Q9SKD9|WRK46_ARATH	80.1	1e-15	Probable WRKY transcription factor 46 OS=Arabidopsis thaliana GN=WRKY46 PE=2 SV=1	--	--	--	--	--	K13425	1e-09	61.6	vvi:100256849	WRKY transcription factor 22	-	-	GO:0009536//plastid	ko04626//Plant-pathogen interaction
WRKY51
Unigene16842_All	808	87	225	3.5311	9.3608	1.4065	Up	3.6575e-16	4.8079e-15	gi|670389407|ref|XP_008675106.1|	223.4	2e-57	PREDICTED: probable WRKY transcription factor 51 [Zea mays]	sp|Q93WU9|WRK51_ARATH	129	3e-30	Probable WRKY transcription factor 51 OS=Arabidopsis thaliana GN=WRKY51 PE=2 SV=1	--	--	--	--	--	K13424	1e-20	98.6	osa:4327518	WRKY transcription factor 33	GO:0006355//regulation of transcription, DNA-dependent	GO:0003700//sequence-specific DNA binding transcription factor activity;GO:0043565//sequence-specific DNA binding	GO:0009536//plastid	ko04626//Plant-pathogen interaction
Unigene19854_All	866	96	200	3.6355	7.7635	1.0946	Up	2.8172e-10	2.4914e-09	gi|357136163|ref|XP_003569675.1|	123.6	3e-27	PREDICTED: probable WRKY transcription factor 51-like [Brachypodium distachyon]	sp|Q93WU9|WRK51_ARATH	79.7	2e-15	Probable WRKY transcription factor 51 OS=Arabidopsis thaliana GN=WRKY51 PE=2 SV=1	--	--	--	--	--	K13424	3e-07	53.9	zma:100281160	WRKY transcription factor 33	GO:0006355//regulation of transcription, DNA-dependent	GO:0003700//sequence-specific DNA binding transcription factor activity;GO:0043565//sequence-specific DNA binding	GO:0009536//plastid	ko04626//Plant-pathogen interaction
WRKY26
CL168.Contig2_All	1228	2542	959	67.8866	26.252	-1.3707	Down	5.1e-155	6.2373e-153	gi|573944728|ref|XP_006654710.1|	316.2	6e-85	PREDICTED: probable WRKY transcription factor 26-like [Oryza brachyantha]	sp|Q93WU9|WRK51_ARATH	136	2e-32	Probable WRKY transcription factor 51 OS=Arabidopsis thaliana GN=WRKY51 PE=2 SV=1	DR0479	50.1	8e-06	COG0744	Membrane carboxypeptidase (penicillin-binding protein)	K13424	3e-22	104	aly:ARALYDRAFT_482857	WRKY transcription factor 33	-	-	GO:0009536//plastid	ko04626//Plant-pathogen interaction
WRKY6
CL178.Contig2_All	1968	976	352	16.2641	6.0126	-1.4356	Down	6.1882e-65	2.9362e-63	gi|8467950|dbj|BAA96574.1|	635.2	1e-180	WRKY transcription factor 6 -like [Oryza sativa Japonica Group] >gi|46394272|tpg|DAA05074.1| TPA_inf: WRKY transcription factor 9 [Oryza sativa (japonica cultivar-group)]	sp|Q93WT0|WRK31_ARATH	296	2e-80	Probable WRKY transcription factor 31 OS=Arabidopsis thaliana GN=WRKY31 PE=2 SV=1	--	--	--	--	--	K13424	2e-30	132	pop:POPTR_577093	WRKY transcription factor 33	-	-	-	ko04626//Plant-pathogen interaction
CL178.Contig1_All	1961	1040	389	17.3925	6.6683	-1.3831	Down	2.1794e-65	1.0419e-63	gi|8467950|dbj|BAA96574.1|	627.5	2e-178	WRKY transcription factor 6 -like [Oryza sativa Japonica Group] >gi|46394272|tpg|DAA05074.1| TPA_inf: WRKY transcription factor 9 [Oryza sativa (japonica cultivar-group)]	sp|Q93WT0|WRK31_ARATH	293	3e-79	Probable WRKY transcription factor 31 OS=Arabidopsis thaliana GN=WRKY31 PE=2 SV=1	--	--	--	--	--	K13424	2e-30	132	pop:POPTR_577093	WRKY transcription factor 33	-	-	-	ko04626//Plant-pathogen interaction
WRKY3
CL6449.Contig1_All	1592	340	130	7.0039	2.745	-1.3514	Down	9.3384e-22	1.609e-20	gi|357122123|ref|XP_003562765.1|	586.6	3e-166	PREDICTED: probable WRKY transcription factor 3-like [Brachypodium distachyon]	sp|Q9ZQ70|WRKY3_ARATH	244	1e-64	Probable WRKY transcription factor 3 OS=Arabidopsis thaliana GN=WRKY3 PE=2 SV=1	--	--	--	--	--	K13424	2e-56	218	rcu:RCOM_0849600	WRKY transcription factor 33	-	-	-	ko04626//Plant-pathogen interaction
CL6449.Contig3_All	1764	311	112	5.7819	2.1343	-1.4378	Down	7.5446e-22	1.3061e-20	gi|357122123|ref|XP_003562765.1|	586.6	3e-166	PREDICTED: probable WRKY transcription factor 3-like [Brachypodium distachyon]	sp|Q9ZQ70|WRKY3_ARATH	244	1e-64	Probable WRKY transcription factor 3 OS=Arabidopsis thaliana GN=WRKY3 PE=2 SV=1	--	--	--	--	--	K13424	2e-56	218	rcu:RCOM_0849600	WRKY transcription factor 33	-	-	-	ko04626//Plant-pathogen interaction
CL6449.Contig4_All	1877	237	94	4.1409	1.6835	-1.2985	Down	8.8533e-15	1.0744e-13	gi|357122123|ref|XP_003562765.1|	645.6	0	PREDICTED: probable WRKY transcription factor 3-like [Brachypodium distachyon]	sp|Q9ZQ70|WRKY3_ARATH	244	1e-64	Probable WRKY transcription factor 3 OS=Arabidopsis thaliana GN=WRKY3 PE=2 SV=1	--	--	--	--	--	K13424	2e-56	218	rcu:RCOM_0849600	WRKY transcription factor 33	-	-	-	ko04626//Plant-pathogen interaction
CL6449.Contig2_All	1705	648	253	12.464	4.9881	-1.3212	Down	1.0437e-38	3.0325e-37	gi|357122123|ref|XP_003562765.1|	645.6	0	PREDICTED: probable WRKY transcription factor 3-like [Brachypodium distachyon]	sp|Q9ZQ70|WRKY3_ARATH	244	1e-64	Probable WRKY transcription factor 3 OS=Arabidopsis thaliana GN=WRKY3 PE=2 SV=1	--	--	--	--	--	K13424	2e-56	218	rcu:RCOM_0849600	WRKY transcription factor 33	-	-	-	ko04626//Plant-pathogen interaction
CL6449.Contig5_All	1666	193	81	3.7992	1.6344	-1.2169	Down	2.9502e-11	2.8317e-10	gi|357122123|ref|XP_003562765.1|	589.3	5e-167	PREDICTED: probable WRKY transcription factor 3-like [Brachypodium distachyon]	sp|Q9ZQ70|WRKY3_ARATH	244	1e-64	Probable WRKY transcription factor 3 OS=Arabidopsis thaliana GN=WRKY3 PE=2 SV=1	--	--	--	--	--	K13424	1e-56	219	rcu:RCOM_0849600	WRKY transcription factor 33	-	-	-	ko04626//Plant-pathogen interaction
WRKY20
CL511.Contig1_All	2157	2300	900	34.9691	14.026	-1.318	Down	2.329e-132	2.4016e-130	gi|357125667|ref|XP_003564512.1|	875.9	0	PREDICTED: probable WRKY transcription factor 20-like [Brachypodium distachyon]	sp|Q8S8P5|WRK33_ARATH	365	7e-101	Probable WRKY transcription factor 33 OS=Arabidopsis thaliana GN=WRKY33 PE=1 SV=2	--	--	--	--	--	K13424	0	870	osa:4327518	WRKY transcription factor 33	-	GO:0003677//DNA binding	GO:0009536//plastid	ko04626//Plant-pathogen interaction
CL511.Contig9_All	2270	1907	744	27.5506	11.0177	-1.3223	Down	1.2909e-110	1.0701e-108	gi|357125667|ref|XP_003564512.1|	866.3	0	PREDICTED: probable WRKY transcription factor 20-like [Brachypodium distachyon]	sp|Q8S8P5|WRK33_ARATH	339	4e-93	Probable WRKY transcription factor 33 OS=Arabidopsis thaliana GN=WRKY33 PE=1 SV=2	--	--	--	--	--	K13424	0	856	osa:4327518	WRKY transcription factor 33	-	GO:0003677//DNA binding	-	ko04626//Plant-pathogen interaction
CL511.Contig2_All	2172	2374	1022	35.8449	15.8174	-1.1803	Down	3.55e-115	3.0915e-113	gi|357125667|ref|XP_003564512.1|	872.1	0	PREDICTED: probable WRKY transcription factor 20-like [Brachypodium distachyon]	sp|Q8S8P5|WRK33_ARATH	362	5e-100	Probable WRKY transcription factor 33 OS=Arabidopsis thaliana GN=WRKY33 PE=1 SV=2	--	--	--	--	--	K13424	0	865	osa:4327518	WRKY transcription factor 33	-	GO:0003677//DNA binding	GO:0009536//plastid	ko04626//Plant-pathogen interaction
CL511.Contig8_All	2275	2240	926	32.2904	13.6827	-1.2388	Down	2.8506e-117	2.5314e-115	gi|357125667|ref|XP_003564512.1|	79.3	2e-13	PREDICTED: probable WRKY transcription factor 20-like [Brachypodium distachyon]	sp|Q8S8P5|WRK33_ARATH	258	2e-93	Probable WRKY transcription factor 33 OS=Arabidopsis thaliana GN=WRKY33 PE=1 SV=2	--	--	--	--	--	K13424	0	664	osa:4327518	WRKY transcription factor 33	-	GO:0003677//DNA binding	GO:0009536//plastid	ko04626//Plant-pathogen interaction
CL511.Contig5_All	2302	1827	776	26.0279	11.3318	-1.1997	Down	2.3117e-91	1.5432e-89	gi|357125667|ref|XP_003564512.1|	90.1	1e-16	PREDICTED: probable WRKY transcription factor 20-like [Brachypodium distachyon]	sp|Q8S8P5|WRK33_ARATH	264	1e-70	Probable WRKY transcription factor 33 OS=Arabidopsis thaliana GN=WRKY33 PE=1 SV=2	--	--	--	--	--	K13424	0	657	osa:4327518	WRKY transcription factor 33	-	GO:0003677//DNA binding	GO:0009536//plastid	ko04626//Plant-pathogen interaction
CL511.Contig6_All	2286	1885	780	27.0422	11.4699	-1.2374	Down	8.1363e-99	5.9383e-97	gi|357125667|ref|XP_003564512.1|	855.1	0	PREDICTED: probable WRKY transcription factor 20-like [Brachypodium distachyon]	sp|Q8S8P5|WRK33_ARATH	344	1e-94	Probable WRKY transcription factor 33 OS=Arabidopsis thaliana GN=WRKY33 PE=1 SV=2	--	--	--	--	--	K13424	0	850	osa:4327518	WRKY transcription factor 33	-	GO:0003677//DNA binding	-	ko04626//Plant-pathogen interaction
WRKY71
CL2147.Contig3_All	1056	230	100	7.1428	3.1833	-1.166	Down	2.2346e-12	2.3293e-11	gi|357115687|ref|XP_003559618.1|	172.6	8e-42	PREDICTED: probable WRKY transcription factor 71-like [Brachypodium distachyon]	sp|Q93WV4|WRK71_ARATH	70.1	2e-12	Probable WRKY transcription factor 71 OS=Arabidopsis thaliana GN=WRKY71 PE=2 SV=1	--	--	--	--	--	K13424	6e-12	70.1	zma:100281160	WRKY transcription factor 33	GO:0006355//regulation of transcription, DNA-dependent	GO:0003700//sequence-specific DNA binding transcription factor activity;GO:0043565//sequence-specific DNA binding	-	ko04626//Plant-pathogen interaction
CL2147.Contig4_All	1184	355	157	9.8329	4.4575	-1.1414	Down	9.5797e-18	1.3756e-16	gi|357115687|ref|XP_003559618.1|	61.2	3e-36	PREDICTED: probable WRKY transcription factor 71-like [Brachypodium distachyon]	sp|Q9C5T3|WRK26_ARATH	42.4	5e-07	Probable WRKY transcription factor 26 OS=Arabidopsis thaliana GN=WRKY26 PE=2 SV=2	--	--	--	--	--	K13424	2e-08	44.3	zma:100281160	WRKY transcription factor 33	-	-	-	ko04626//Plant-pathogen interaction
CL2147.Contig1_All	1026	699	170	22.3427	5.5699	-2.0041	Down	3.2692e-74	1.7464e-72	gi|357115687|ref|XP_003559618.1|	193	6e-48	PREDICTED: probable WRKY transcription factor 71-like [Brachypodium distachyon]	sp|Q9FG77|WRKY2_ARATH	70.9	1e-12	Probable WRKY transcription factor 2 OS=Arabidopsis thaliana GN=WRKY2 PE=2 SV=1	--	--	--	--	--	K13424	7e-12	69.7	zma:100281160	WRKY transcription factor 33	GO:0006355//regulation of transcription, DNA-dependent	GO:0003700//sequence-specific DNA binding transcription factor activity;GO:0043565//sequence-specific DNA binding	-	ko04626//Plant-pathogen interaction
CL2147.Contig2_All	1151	506	155	14.4172	4.5269	-1.6712	Down	1.202e-42	3.8195e-41	gi|357115687|ref|XP_003559618.1|	173.3	5e-42	PREDICTED: probable WRKY transcription factor 71-like [Brachypodium distachyon]	sp|Q93WV4|WRK71_ARATH	56.2	3e-08	Probable WRKY transcription factor 71 OS=Arabidopsis thaliana GN=WRKY71 PE=2 SV=1	--	--	--	--	--	K13424	3e-08	58.2	zma:100281160	WRKY transcription factor 33	-	-	-	ko04626//Plant-pathogen interaction
WRKY21
Unigene20256_All	2397	1469	519	20.0983	7.2785	-1.4654	Down	8.9379e-100	6.5842e-98	gi|112145161|gb|ABI13387.1|	337.4	5e-91	WRKY transcription factor 21, partial [Hordeum vulgare subsp. vulgare]	sp|Q9SUP6|WRK53_ARATH	155	1e-37	Probable WRKY transcription factor 53 OS=Arabidopsis thaliana GN=WRKY53 PE=1 SV=1	--	--	--	--	--	K13424	7e-15	81.3	osa:4338474	WRKY transcription factor 33	-	GO:0003677//DNA binding	GO:0016020//membrane	ko04626//Plant-pathogen interaction
Unigene20253_All	2491	1501	559	19.7612	7.5436	-1.3893	Down	3.3823e-94	2.3336e-92	gi|112145161|gb|ABI13387.1|	159.5	3e-87	WRKY transcription factor 21, partial [Hordeum vulgare subsp. vulgare]	sp|Q9SUP6|WRK53_ARATH	136	5e-32	Probable WRKY transcription factor 53 OS=Arabidopsis thaliana GN=WRKY53 PE=1 SV=1	--	--	--	--	--	K13424	5e-14	78.6	osa:4338474	WRKY transcription factor 33	-	GO:0003677//DNA binding	GO:0016020//membrane	ko04626//Plant-pathogen interaction
Unigene20252_All	3666	1708	721	15.2792	6.6113	-1.2086	Down	1.6241e-86	1.0263e-84	gi|112145161|gb|ABI13387.1|	159.5	5e-87	WRKY transcription factor 21, partial [Hordeum vulgare subsp. vulgare]	sp|Q9SUP6|WRK53_ARATH	136	7e-32	Probable WRKY transcription factor 53 OS=Arabidopsis thaliana GN=WRKY53 PE=1 SV=1	--	--	--	--	--	K13424	7e-14	78.6	osa:4338474	WRKY transcription factor 33	-	GO:0003677//DNA binding	-	ko04626//Plant-pathogen interaction
Unigene20259_All	1479	1634	325	36.2318	7.3868	-2.2942	Down	1.2325e-202	2.0796e-200	gi|112145161|gb|ABI13387.1|	159.5	2e-114	WRKY transcription factor 21, partial [Hordeum vulgare subsp. vulgare]	sp|Q9SUP6|WRK53_ARATH	132	7e-31	Probable WRKY transcription factor 53 OS=Arabidopsis thaliana GN=WRKY53 PE=1 SV=1	--	--	--	--	--	K13426	8e-13	73.6	ath:AT4G23550	WRKY transcription factor 29	-	GO:0003677//DNA binding	-	ko04626//Plant-pathogen interaction
WRKY41
Unigene20255_All	2430	2471	1202	33.3483	16.628	-1.004	Down	1.3143e-92	8.9504e-91	gi|573944941|ref|XP_006654814.1|	262.3	2e-68	PREDICTED: probable WRKY transcription factor 41-like [Oryza brachyantha]	sp|Q9SUP6|WRK53_ARATH	127	4e-29	Probable WRKY transcription factor 53 OS=Arabidopsis thaliana GN=WRKY53 PE=1 SV=1	--	--	--	--	--	K13424	7e-15	81.3	osa:4338474	WRKY transcription factor 33	-	-	GO:0016020//membrane	ko04626//Plant-pathogen interaction
Unigene20254_All	3575	2919	1244	26.7772	11.6973	-1.1948	Down	6.5849e-144	7.51e-142	gi|573944941|ref|XP_006654814.1|	262.3	3e-68	PREDICTED: probable WRKY transcription factor 41-like [Oryza brachyantha]	sp|Q9SUP6|WRK53_ARATH	127	6e-29	Probable WRKY transcription factor 53 OS=Arabidopsis thaliana GN=WRKY53 PE=1 SV=1	--	--	--	--	--	K13424	1e-14	81.3	osa:4338474	WRKY transcription factor 33	-	-	-	ko04626//Plant-pathogen interaction
WRKY11
CL4223.Contig1_All	250	220	86	28.8595	11.5638	-1.3194	Down	3.9325e-14	4.5889e-13	gi|115460384|ref|NP_001053792.1|	115.5	2e-25	Os04g0605100 [Oryza sativa Japonica Group] >gi|38346908|emb|CAE03880.2| OSJNBb0015N08.8 [Oryza sativa Japonica Group] >gi|46394390|tpg|DAA05133.1| TPA_inf: WRKY transcription factor 68 [Oryza sativa (indica cultivar-group)] >gi|113565363|dbj|BAF15706.1| Os04g0605100 [Oryza sativa Japonica Group]	sp|Q9SV15|WRK11_ARATH	82	7e-17	Probable WRKY transcription factor 11 OS=Arabidopsis thaliana GN=WRKY11 PE=2 SV=2	--	--	--	--	--	K13424	1e-09	59.7	zma:100281160	WRKY transcription factor 33	GO:0006355//regulation of transcription, DNA-dependent	GO:0003700//sequence-specific DNA binding transcription factor activity;GO:0043565//sequence-specific DNA binding	-	ko04626//Plant-pathogen interaction
WRKY58
CL4473.Contig1_All	1801	759	280	13.8208	5.2262	-1.403	Down	3.268e-49	1.2e-47	gi|357114915|ref|XP_003559239.1|	392.9	8e-108	PREDICTED: probable WRKY transcription factor 58-like [Brachypodium distachyon]	sp|Q9C983|WRK57_ARATH	188	8e-48	Probable WRKY transcription factor 57 OS=Arabidopsis thaliana GN=WRKY57 PE=2 SV=1	--	--	--	--	--	K13424	1e-25	116	zma:100281160	WRKY transcription factor 33	-	GO:0003677//DNA binding	-	ko04626//Plant-pathogen interaction
CL4473.Contig3_All	1762	1571	516	29.24	9.8443	-1.5706	Down	7.5926e-118	6.7996e-116	gi|357114915|ref|XP_003559239.1|	391.3	2e-107	PREDICTED: probable WRKY transcription factor 58-like [Brachypodium distachyon]	sp|Q9C983|WRK57_ARATH	188	7e-48	Probable WRKY transcription factor 57 OS=Arabidopsis thaliana GN=WRKY57 PE=2 SV=1	--	--	--	--	--	K13424	1e-25	116	zma:100281160	WRKY transcription factor 33	-	GO:0003677//DNA binding	-	ko04626//Plant-pathogen interaction
WRKY7
CL168.Contig3_All	711	899	320	41.4664	15.1295	-1.4546	Down	4.1734e-61	1.8643e-59	gi|46394268|gb|DAA05072.1|	233.8	1e-60	TPA_inf: WRKY transcription factor 7 [Oryza sativa (japonica cultivar-group)]	sp|Q8VWQ5|WRK50_ARATH	136	1e-32	Probable WRKY transcription factor 50 OS=Arabidopsis thaliana GN=WRKY50 PE=2 SV=1	--	--	--	--	--	K13424	2e-22	104	aly:ARALYDRAFT_482857	WRKY transcription factor 33	GO:0006355//regulation of transcription, DNA-dependent	GO:0003700//sequence-specific DNA binding transcription factor activity;GO:0043565//sequence-specific DNA binding	GO:0009536//plastid	ko04626//Plant-pathogen interaction
CL168.Contig4_All	944	610	205	21.1916	7.3	-1.5375	Down	1.8238e-45	6.1177e-44	gi|46394268|gb|DAA05072.1|	146.4	5e-34	TPA_inf: WRKY transcription factor 7 [Oryza sativa (japonica cultivar-group)]	sp|Q93WU9|WRK51_ARATH	80.1	2e-15	Probable WRKY transcription factor 51 OS=Arabidopsis thaliana GN=WRKY51 PE=2 SV=1	--	--	--	--	--	K13424	4e-09	60.5	rcu:RCOM_0664190	WRKY transcription factor 33	GO:0006355//regulation of transcription, DNA-dependent	GO:0003700//sequence-specific DNA binding transcription factor activity;GO:0043565//sequence-specific DNA binding	GO:0009536//plastid	ko04626//Plant-pathogen interaction
WRKY1
CL14068.Contig1_All	626	1066	210	55.8457	11.2769	-2.3081	Down	8.0983e-134	8.4706e-132	gi|4894965|gb|AAD32677.1|AF140554_1	135.6	4e-31	DNA-binding protein WRKY1 [Avena sativa]	--	--	--	--	--	--	--	--	--	K13424	3e-16	83.2	osa:4327518	WRKY transcription factor 33	-	-	-	ko04626//Plant-pathogen interaction
CL14068.Contig2_All	697	598	216	28.1368	10.4175	-1.4334	Down	2.3054e-40	6.9856e-39	gi|4894965|gb|AAD32677.1|AF140554_1	131	1e-29	DNA-binding protein WRKY1 [Avena sativa]	--	--	--	--	--	--	--	--	--	K13424	2e-15	80.9	sbi:SORBI_09g023270	WRKY transcription factor 33	-	-	-	ko04626//Plant-pathogen interaction
Unigene18532_All	807	162	56	6.5834	2.3327	-1.4968	Down	9.7547e-13	1.0426e-11	gi|514814098|ref|XP_004981825.1|	186.8	2e-46	PREDICTED: protein WRKY1-like [Setaria italica]	sp|Q32SG4|WRKY1_MAIZE	186	1e-47	Protein WRKY1 OS=Zea mays PE=1 SV=1	--	--	--	--	--	K13425	3e-21	100	rcu:RCOM_1616660	WRKY transcription factor 22	GO:0006355//regulation of transcription, DNA-dependent	GO:0003700//sequence-specific DNA binding transcription factor activity;GO:0043565//sequence-specific DNA binding;GO:0005515//protein binding	GO:0005634//nucleus	ko04626//Plant-pathogen interaction
CL5938.Contig1_All	1752	512	206	9.5839	3.9525	-1.2778	Down	1.8676e-29	4.2243e-28	gi|357116216|ref|XP_003559879.1|	699.9	0	PREDICTED: protein WRKY1-like [Brachypodium distachyon]	sp|Q32SG4|WRKY1_MAIZE	648	0	Protein WRKY1 OS=Zea mays PE=1 SV=1	--	--	--	--	--	K13425	4e-22	104	pop:POPTR_755334	WRKY transcription factor 22	GO:0006355//regulation of transcription, DNA-dependent	GO:0003700//sequence-specific DNA binding transcription factor activity;GO:0043565//sequence-specific DNA binding;GO:0005515//protein binding	GO:0005634//nucleus	ko04626//Plant-pathogen interaction
CL1657.Contig4_All	1576	10210	4746	212.459	101.231	-1.0695	Down	0	0	gi|84795220|gb|ABC65846.1|	439.5	6e-122	WRKY transcription factor WRKY1A [Triticum aestivum]	sp|Q8H0Y8|WRK41_ARATH	131	1e-30	Probable WRKY transcription factor 41 OS=Arabidopsis thaliana GN=WRKY41 PE=2 SV=2	CC0042	55.5	3e-07	COG0532	Translation initiation factor 2 (IF-2; GTPase)	K13426	4e-15	81.3	rcu:RCOM_1689100	WRKY transcription factor 29	-	-	-	ko04626//Plant-pathogen interaction
CL1657.Contig2_All	216	14	43	2.1256	6.692	1.6546	Up	6.8372e-05	0.00030632	gi|84795220|gb|ABC65846.1|	121.7	2e-27	WRKY transcription factor WRKY1A [Triticum aestivum]	sp|Q8H0Y8|WRK41_ARATH	80.5	2e-16	Probable WRKY transcription factor 41 OS=Arabidopsis thaliana GN=WRKY41 PE=2 SV=2	--	--	--	--	--	K13426	3e-09	58.2	rcu:RCOM_1689100	WRKY transcription factor 29	GO:0006355//regulation of transcription, DNA-dependent	GO:0003700//sequence-specific DNA binding transcription factor activity;GO:0043565//sequence-specific DNA binding	-	ko04626//Plant-pathogen interaction
WRKY2
CL14155.Contig3_All	806	165	71	6.7136	2.9612	-1.1809	Down	1.9627e-09	1.6105e-08	gi|357141764|ref|XP_003572339.1|	80.5	2e-14	PREDICTED: probable WRKY transcription factor 2-like [Brachypodium distachyon]	sp|Q9FG77|WRKY2_ARATH	201	3e-52	Probable WRKY transcription factor 2 OS=Arabidopsis thaliana GN=WRKY2 PE=2 SV=1	--	--	--	--	--	K13424	4e-40	162	pop:POPTR_663578	WRKY transcription factor 33	GO:0009942//longitudinal axis specification;GO:0006355//regulation of transcription, DNA-dependent;GO:0030010//establishment of cell polarity	-	-	ko04626//Plant-pathogen interaction
WRKY55
CL2736.Contig5_All	1290	44	228	1.1186	5.9414	2.4091	Up	2.4068e-32	5.9085e-31	gi|475580508|gb|EMT18621.1|	215.3	1e-54	WRKY transcription factor 55 [Aegilops tauschii]	sp|Q93WU8|WRK54_ARATH	80.9	1e-15	Probable WRKY transcription factor 54 OS=Arabidopsis thaliana GN=WRKY54 PE=2 SV=2	YMR109w	53.5	8e-07	COG5022	Myosin heavy chain	K13426	6e-12	70.5	ath:AT4G23550	WRKY transcription factor 29	-	-	-	ko04626//Plant-pathogen interaction
CL2736.Contig6_All	1400	31	143	0.7262	3.4336	2.2413	Up	3.1654e-19	4.8873e-18	gi|475580508|gb|EMT18621.1|	211.1	3e-53	WRKY transcription factor 55 [Aegilops tauschii]	sp|Q9LY00|WRK70_ARATH	80.9	2e-15	Probable WRKY transcription factor 70 OS=Arabidopsis thaliana GN=WRKY70 PE=2 SV=1	--	--	--	--	--	K13424	1e-14	79.3	sbi:SORBI_03g038510	WRKY transcription factor 33	-	-	-	ko04626//Plant-pathogen interaction
CL2736.Contig3_All	1147	70	151	2.0014	4.4254	1.1448	Up	1.3472e-08	1.0153e-07	gi|475580508|gb|EMT18621.1|	218	2e-55	WRKY transcription factor 55 [Aegilops tauschii]	sp|Q93WU8|WRK54_ARATH	81.3	1e-15	Probable WRKY transcription factor 54 OS=Arabidopsis thaliana GN=WRKY54 PE=2 SV=2	--	--	--	--	--	K13424	1e-13	75.9	sbi:SORBI_03g038510	WRKY transcription factor 33	-	-	-	ko04626//Plant-pathogen interaction
CL2736.Contig9_All	1418	32	248	0.7401	5.8792	2.9898	Up	5.4512e-44	1.7818e-42	gi|475580508|gb|EMT18621.1|	219.2	1e-55	WRKY transcription factor 55 [Aegilops tauschii]	sp|Q93WU8|WRK54_ARATH	77.4	2e-14	Probable WRKY transcription factor 54 OS=Arabidopsis thaliana GN=WRKY54 PE=2 SV=2	YMR109w	53.5	9e-07	COG5022	Myosin heavy chain	K13426	2e-12	72	ath:AT4G23550	WRKY transcription factor 29	-	-	-	ko04626//Plant-pathogen interaction
CL2736.Contig1_All	1305	52	351	1.3068	9.0415	2.7905	Up	1.833e-57	7.7153e-56	gi|475580508|gb|EMT18621.1|	219.2	1e-55	WRKY transcription factor 55 [Aegilops tauschii]	sp|Q93WU8|WRK54_ARATH	77.4	2e-14	Probable WRKY transcription factor 54 OS=Arabidopsis thaliana GN=WRKY54 PE=2 SV=2	YMR109w	53.5	8e-07	COG5022	Myosin heavy chain	K13426	2e-12	72	ath:AT4G23550	WRKY transcription factor 29	-	-	-	ko04626//Plant-pathogen interaction
CL2736.Contig4_All	1222	55	237	1.476	6.5196	2.1431	Up	2.7473e-29	6.1817e-28	gi|475580508|gb|EMT18621.1|	216.5	6e-55	WRKY transcription factor 55 [Aegilops tauschii]	sp|Q9SHB5|WRK55_ARATH	85.1	7e-17	WRKY transcription factor 55 OS=Arabidopsis thaliana GN=WRKY55 PE=2 SV=1	YMR109w	57.4	5e-08	COG5022	Myosin heavy chain	K13426	7e-15	80.1	aly:ARALYDRAFT_492514	WRKY transcription factor 29	-	-	-	ko04626//Plant-pathogen interaction
Unigene17732_All	1436	22	119	0.5024	2.7857	2.4711	Up	4.594e-18	6.7235e-17	gi|475580508|gb|EMT18621.1|	227.6	3e-58	WRKY transcription factor 55 [Aegilops tauschii]	sp|Q9SUS1|WRK29_ARATH	78.6	8e-15	Probable WRKY transcription factor 29 OS=Arabidopsis thaliana GN=WRKY29 PE=2 SV=1	YMR109w	60.5	7e-09	COG5022	Myosin heavy chain	K13425	1e-14	79.7	rcu:RCOM_1616660	WRKY transcription factor 22	-	-	-	ko04626//Plant-pathogen interaction
CL11908.Contig1_All	1254	476	230	12.4485	6.1656	-1.0137	Down	1.8285e-19	2.8548e-18	gi|357129469|ref|XP_003566384.1|	458.4	1e-127	PREDICTED: WRKY transcription factor 55-like [Brachypodium distachyon]	sp|Q9SHB5|WRK55_ARATH	153	2e-37	WRKY transcription factor 55 OS=Arabidopsis thaliana GN=WRKY55 PE=2 SV=1	--	--	--	--	--	K13424	3e-14	78.2	zma:100279301	WRKY transcription factor 33	-	-	-	ko04626//Plant-pathogen interaction
WRKY53
CL15058.Contig2_All	1388	2037	669	48.1291	16.2024	-1.5707	Down	3.0002e-152	3.6086e-150	gi|474195961|gb|EMS58362.1|	295	1e-78	putative WRKY transcription factor 53 [Triticum urartu]	sp|Q9SUP6|WRK53_ARATH	122	5e-28	Probable WRKY transcription factor 53 OS=Arabidopsis thaliana GN=WRKY53 PE=1 SV=1	--	--	--	--	--	K13426	1e-13	75.9	ath:AT4G23550	WRKY transcription factor 29	-	-	-	ko04626//Plant-pathogen interaction
Unigene20258_All	1385	1575	290	37.2939	7.0387	-2.4056	Down	9.8761e-207	1.6906e-204	gi|474195961|gb|EMS58362.1|	426.8	3e-118	putative WRKY transcription factor 53 [Triticum urartu]	sp|Q9SUP6|WRK53_ARATH	150	2e-36	Probable WRKY transcription factor 53 OS=Arabidopsis thaliana GN=WRKY53 PE=1 SV=1	--	--	--	--	--	K13426	9e-14	76.6	ath:AT4G23550	WRKY transcription factor 29	-	GO:0003677//DNA binding	-	ko04626//Plant-pathogen interaction
WRKY40
Unigene16862_All	740	2631	806	116.599	36.6139	-1.6711	Down	3.4538e-214	6.1803e-212	gi|475502054|gb|EMT04396.1|	151.4	1e-35	Putative WRKY transcription factor 40 [Aegilops tauschii]	sp|Q9C5T4|WRK18_ARATH	82	3e-16	WRKY transcription factor 18 OS=Arabidopsis thaliana GN=WRKY18 PE=1 SV=2	Cgl1939	50.1	4e-06	COG0532	Translation initiation factor 2 (IF-2; GTPase)	K13424	8e-06	48.9	osa:4338474	WRKY transcription factor 33	GO:0006952//defense response;GO:0009685//gibberellin metabolic process	GO:0043565//sequence-specific DNA binding;GO:0003700//sequence-specific DNA binding transcription factor activity	GO:0005634//nucleus	ko04626//Plant-pathogen interaction
WRKY33
Unigene4825_All	402	543	95	44.2976	7.944	-2.4793	Down	5.3618e-75	2.9103e-73	gi|475560487|gb|EMT13570.1|	192.2	1e-48	Putative WRKY transcription factor 33 [Aegilops tauschii]	sp|Q8S8P5|WRK33_ARATH	114	1e-26	Probable WRKY transcription factor 33 OS=Arabidopsis thaliana GN=WRKY33 PE=1 SV=2	--	--	--	--	--	K13424	2e-48	188	sbi:SORBI_03g038510	WRKY transcription factor 33	GO:0006355//regulation of transcription, DNA-dependent	GO:0003700//sequence-specific DNA binding transcription factor activity;GO:0043565//sequence-specific DNA binding	GO:0009536//plastid	ko04626//Plant-pathogen interaction
Unigene4405_All	351	874	260	81.6603	24.9006	-1.7135	Down	5.9269e-75	3.2133e-73	gi|475560487|gb|EMT13570.1|	177.2	5e-44	Putative WRKY transcription factor 33 [Aegilops tauschii]	sp|Q8S8P5|WRK33_ARATH	97.8	1e-21	Probable WRKY transcription factor 33 OS=Arabidopsis thaliana GN=WRKY33 PE=1 SV=2	--	--	--	--	--	K13424	1e-43	172	sbi:SORBI_03g038510	WRKY transcription factor 33	GO:0006355//regulation of transcription, DNA-dependent	GO:0003700//sequence-specific DNA binding transcription factor activity;GO:0043565//sequence-specific DNA binding	GO:0009536//plastid	ko04626//Plant-pathogen interaction
CL5906.Contig2_All	759	1460	283	63.0838	12.5339	-2.3314	Down	8.4597e-185	1.2895e-182	gi|474376790|gb|EMS64213.1|	241.9	6e-63	putative WRKY transcription factor 33 [Triticum urartu]	sp|Q8S8P5|WRK33_ARATH	60.8	8e-10	Probable WRKY transcription factor 33 OS=Arabidopsis thaliana GN=WRKY33 PE=1 SV=2	--	--	--	--	--	K13424	7e-50	195	sbi:SORBI_09g023270	WRKY transcription factor 33	-	-	GO:0009536//plastid	ko04626//Plant-pathogen interaction
CL5906.Contig1_All	771	1845	539	78.4781	23.5005	-1.7396	Down	1.7625e-159	2.2335e-157	gi|474376790|gb|EMS64213.1|	226.5	3e-58	putative WRKY transcription factor 33 [Triticum urartu]	sp|Q8S8P5|WRK33_ARATH	64.3	7e-11	Probable WRKY transcription factor 33 OS=Arabidopsis thaliana GN=WRKY33 PE=1 SV=2	--	--	--	--	--	K13424	2e-46	184	sbi:SORBI_09g023270	WRKY transcription factor 33	-	-	GO:0009536//plastid	ko04626//Plant-pathogen interaction
WRKY70
CL10835.Contig2_All	612	88	10	4.7156	0.5493	-3.1018	Down	1.4593e-16	1.9693e-15	gi|474451443|gb|EMS68912.1|	217.2	1e-55	putative WRKY transcription factor 70 [Triticum urartu]	sp|Q9SKD9|WRK46_ARATH	87	7e-18	Probable WRKY transcription factor 46 OS=Arabidopsis thaliana GN=WRKY46 PE=2 SV=1	--	--	--	--	--	K13424	2e-12	70.1	aly:ARALYDRAFT_482857	WRKY transcription factor 33	-	-	-	ko04626//Plant-pathogen interaction
Unigene12673_All	1557	745	338	15.6919	7.2974	-1.1046	Down	9.1258e-34	2.3303e-32	gi|475559545|gb|EMT13369.1|	290	6e-77	Putative WRKY transcription factor 70 [Aegilops tauschii]	sp|Q9LY00|WRK70_ARATH	107	2e-23	Probable WRKY transcription factor 70 OS=Arabidopsis thaliana GN=WRKY70 PE=2 SV=1	DR2133	50.4	8e-06	COG4372	Uncharacterized protein conserved in bacteria with the myosin-like domain	K13424	4e-13	74.7	zma:100281160	WRKY transcription factor 33	-	-	-	ko04626//Plant-pathogen interaction
WRKY22
CL4876.Contig1_All	823	144	28	5.7381	1.1437	-2.3269	Down	1.3083e-19	2.0561e-18	gi|357139226|ref|XP_003571185.1|	214.9	1e-54	PREDICTED: WRKY transcription factor 22-like [Brachypodium distachyon]	sp|O04609|WRK22_ARATH	59.7	2e-09	WRKY transcription factor 22 OS=Arabidopsis thaliana GN=WRKY22 PE=2 SV=1	--	--	--	--	--	K13426	6e-10	62.8	pop:POPTR_646672	WRKY transcription factor 29	-	-	-	ko04626//Plant-pathogen interaction
CL13979.Contig1_All	1035	238	73	7.5412	2.371	-1.6693	Down	7.3169e-21	1.2194e-19	gi|357139226|ref|XP_003571185.1|	272.3	7e-72	PREDICTED: WRKY transcription factor 22-like [Brachypodium distachyon]	sp|Q9FLX8|WRK27_ARATH	115	4e-26	Probable WRKY transcription factor 27 OS=Arabidopsis thaliana GN=WRKY27 PE=2 SV=1	--	--	--	--	--	K13425	1e-26	118	pop:POPTR_755334	WRKY transcription factor 22	GO:0006355//regulation of transcription, DNA-dependent;GO:0010033//response to organic substance	GO:0005488//binding	-	ko04626//Plant-pathogen interaction
CL13979.Contig2_All	263	75	32	9.3522	4.0901	-1.1932	Down	4.7945e-05	0.0002219	gi|357139226|ref|XP_003571185.1|	151.4	3e-36	PREDICTED: WRKY transcription factor 22-like [Brachypodium distachyon]	sp|Q9FLX8|WRK27_ARATH	70.1	3e-13	Probable WRKY transcription factor 27 OS=Arabidopsis thaliana GN=WRKY27 PE=2 SV=1	--	--	--	--	--	K13426	1e-14	76.3	vvi:100251862	WRKY transcription factor 29	GO:0009739//response to gibberellin stimulus;GO:0042742//defense response to bacterium;GO:0007263//nitric oxide mediated signal transduction;GO:0045892//negative regulation of transcription, DNA-dependent	GO:0005515//protein binding	GO:0005634//nucleus	ko04626//Plant-pathogen interaction
Unigene15232_All	1512	330	144	7.1576	3.2015	-1.1607	Down	5.184e-17	7.1565e-16	gi|357130531|ref|XP_003566901.1|	472.2	8e-132	PREDICTED: WRKY transcription factor 22-like [Brachypodium distachyon]	sp|Q9FLX8|WRK27_ARATH	149	4e-36	Probable WRKY transcription factor 27 OS=Arabidopsis thaliana GN=WRKY27 PE=2 SV=1	--	--	--	--	--	K13425	1e-36	152	pop:POPTR_755334	WRKY transcription factor 22	-	-	-	ko04626//Plant-pathogen interaction
WRKY57
Unigene18778_All	372	71	23	6.2592	2.0784	-1.5905	Down	8.7489e-07	5.3328e-06	gi|475627063|gb|EMT33560.1|	160.2	7e-39	Putative WRKY transcription factor 57 [Aegilops tauschii]	sp|Q9C983|WRK57_ARATH	129	6e-31	Probable WRKY transcription factor 57 OS=Arabidopsis thaliana GN=WRKY57 PE=2 SV=1	--	--	--	--	--	K13424	3e-18	87.8	sbi:SORBI_09g023270	WRKY transcription factor 33	GO:0009414//response to water deprivation;GO:0009651//response to salt stress;GO:0006355//regulation of transcription, DNA-dependent	GO:0003700//sequence-specific DNA binding transcription factor activity;GO:0043565//sequence-specific DNA binding	-	ko04626//Plant-pathogen interaction
WRKY23
Unigene39229_All	1805	56	324	1.0175	6.0341	2.5681	Up	1.158e-48	4.1965e-47	gi|475622175|gb|EMT31777.1|	292.7	1e-77	Putative WRKY transcription factor 23 [Aegilops tauschii]	sp|Q93WV4|WRK71_ARATH	171	1e-42	Probable WRKY transcription factor 71 OS=Arabidopsis thaliana GN=WRKY71 PE=2 SV=1	--	--	--	--	--	K13424	6e-26	117	osa:4338474	WRKY transcription factor 33	-	-	-	ko04626//Plant-pathogen interaction
Unigene21427_All	1820	54	317	0.973	5.8551	2.5892	Up	4.522e-48	1.6184e-46	gi|475622175|gb|EMT31777.1|	292.7	1e-77	Putative WRKY transcription factor 23 [Aegilops tauschii]	sp|Q93WV4|WRK71_ARATH	171	1e-42	Probable WRKY transcription factor 71 OS=Arabidopsis thaliana GN=WRKY71 PE=2 SV=1	--	--	--	--	--	K13424	6e-26	117	osa:4338474	WRKY transcription factor 33	-	-	-	ko04626//Plant-pathogen interaction
RPM1
CL9260.Contig3_All	942	2	102	0.0696	3.6399	5.7087	Up	7.8082e-29	1.7253e-27	gi|357135028|ref|XP_003569114.1|	368.6	7e-101	PREDICTED: disease resistance protein RPM1-like [Brachypodium distachyon]	sp|Q39214|RPM1_ARATH	54.7	8e-08	Disease resistance protein RPM1 OS=Arabidopsis thaliana GN=RPM1 PE=1 SV=1	--	--	--	--	--	K13457	6e-13	73.2	rcu:RCOM_0742270	disease resistance protein RPM1	GO:0006952//defense response;GO:0006915//apoptotic process	GO:0005524//ATP binding	-	ko04626//Plant-pathogen interaction;ko03020//RNA polymerase;ko00240//Pyrimidine metabolism;ko01100//Metabolic pathways;ko00230//Purine metabolism
CL13422.Contig1_All	552	0	48	0	2.9231	11.5133	Up	1.9315e-15	2.4346e-14	gi|357151479|ref|XP_003575804.1|	279.6	1e-74	PREDICTED: disease resistance protein RPM1-like [Brachypodium distachyon]	sp|Q39214|RPM1_ARATH	49.3	1e-06	Disease resistance protein RPM1 OS=Arabidopsis thaliana GN=RPM1 PE=1 SV=1	--	--	--	--	--	K13457	4e-10	62.4	rcu:RCOM_0742270	disease resistance protein RPM1	-	-	-	ko04626//Plant-pathogen interaction
CL11573.Contig2_All	1306	39	119	0.9793	3.063	1.6451	Up	3.1086e-11	2.9784e-10	gi|357135028|ref|XP_003569114.1|	92.8	1e-17	PREDICTED: disease resistance protein RPM1-like [Brachypodium distachyon]	sp|Q38834|R13L4_ARATH	185	6e-47	Disease resistance RPP13-like protein 4 OS=Arabidopsis thaliana GN=RPP13L4 PE=2 SV=2	--	--	--	--	--	K13457	2e-55	214	rcu:RCOM_0742270	disease resistance protein RPM1	GO:0006915//apoptotic process;GO:0006952//defense response	GO:0043531//ADP binding;GO:0005524//ATP binding	-	ko04626//Plant-pathogen interaction
Unigene40051_All	371	0	33	0	2.9901	11.546	Up	7.6272e-11	7.0756e-10	gi|357155740|ref|XP_003577222.1|	176.4	1e-43	PREDICTED: disease resistance protein RPM1-like [Brachypodium distachyon]	sp|P0C8S1|RP8L2_ARATH	52.4	7e-08	Probable disease resistance RPP8-like protein 2 OS=Arabidopsis thaliana GN=RPP8L2 PE=1 SV=1	--	--	--	--	--	K13457	7e-09	57	pop:POPTR_755797	disease resistance protein RPM1	-	-	-	ko04626//Plant-pathogen interaction
Unigene17462_All	988	58	145	1.9252	4.9335	1.3576	Up	1.9968e-10	1.7864e-09	gi|357155690|ref|XP_003577204.1|	268.5	1e-70	PREDICTED: disease resistance protein RPM1-like [Brachypodium distachyon]	sp|Q39214|RPM1_ARATH	72	5e-13	Disease resistance protein RPM1 OS=Arabidopsis thaliana GN=RPM1 PE=1 SV=1	--	--	--	--	--	K13457	1e-25	115	sbi:SORBI_10g028730	disease resistance protein RPM1	-	-	-	ko04626//Plant-pathogen interaction
Unigene38815_All	378	1	29	0.0868	2.579	4.893	Up	2.0759e-08	1.5361e-07	gi|357135034|ref|XP_003569117.1|	182.6	1e-45	PREDICTED: disease resistance protein RPM1-like [Brachypodium distachyon]	sp|Q39214|RPM1_ARATH	49.3	6e-07	Disease resistance protein RPM1 OS=Arabidopsis thaliana GN=RPM1 PE=1 SV=1	--	--	--	--	--	K13457	4e-08	54.3	vvi:100252764	disease resistance protein RPM1	-	-	-	ko04626//Plant-pathogen interaction
CL15353.Contig1_All	336	0	19	0	1.9009	10.8925	Up	1.4873e-06	8.7819e-06	gi|357151479|ref|XP_003575804.1|	165.2	2e-40	PREDICTED: disease resistance protein RPM1-like [Brachypodium distachyon]	--	--	--	--	--	--	--	--	--	K13457	2e-07	52	sbi:SORBI_10g028730	disease resistance protein RPM1	-	-	-	ko04626//Plant-pathogen interaction
CL1475.Contig1_All	728	16	52	0.7208	2.4011	1.736	Up	5.6729e-06	3.0742e-05	gi|357161809|ref|XP_003579210.1|	299.3	3e-80	PREDICTED: disease resistance protein RPM1-like [Brachypodium distachyon]	sp|Q9M667|RPP13_ARATH	89.4	2e-18	Disease resistance protein RPP13 OS=Arabidopsis thaliana GN=RPP13 PE=2 SV=2	--	--	--	--	--	K13457	1e-25	114	pop:POPTR_755797	disease resistance protein RPM1	-	-	GO:0016023//cytoplasmic membrane-bounded vesicle	ko04626//Plant-pathogen interaction
CL467.Contig1_All	898	44	95	1.6069	3.5562	1.1461	Up	6.7127e-06	3.5959e-05	gi|357135028|ref|XP_003569114.1|	54.7	2e-06	PREDICTED: disease resistance protein RPM1-like [Brachypodium distachyon]	sp|Q9M667|RPP13_ARATH	87.4	1e-17	Disease resistance protein RPP13 OS=Arabidopsis thaliana GN=RPP13 PE=2 SV=2	--	--	--	--	--	K13457	4e-19	93.6	pop:POPTR_755797	disease resistance protein RPM1	GO:0006915//apoptotic process;GO:0006952//defense response	GO:0043531//ADP binding;GO:0005524//ATP binding	-	ko04626//Plant-pathogen interaction
Unigene39466_All	564	19	56	1.1048	3.3377	1.5951	Up	9.1226e-06	4.7847e-05	gi|357113252|ref|XP_003558418.1|	258.8	3e-68	PREDICTED: disease resistance protein RPM1-like [Brachypodium distachyon]	sp|Q8W474|DRL7_ARATH	66.2	1e-11	Probable disease resistance protein At1g58390 OS=Arabidopsis thaliana GN=At1g58390 PE=2 SV=4	--	--	--	--	--	K13457	9e-29	124	sbi:SORBI_10g028730	disease resistance protein RPM1	-	-	-	ko04626//Plant-pathogen interaction
Unigene42608_All	336	0	16	0	1.6008	10.6446	Up	1.2351e-05	6.3293e-05	gi|357151479|ref|XP_003575804.1|	147.5	5e-35	PREDICTED: disease resistance protein RPM1-like [Brachypodium distachyon]	sp|Q9M667|RPP13_ARATH	56.2	4e-09	Disease resistance protein RPP13 OS=Arabidopsis thaliana GN=RPP13 PE=2 SV=2	--	--	--	--	--	K13457	2e-07	52.4	vvi:100252764	disease resistance protein RPM1	-	-	-	ko04626//Plant-pathogen interaction
CL7239.Contig3_All	3933	436	109	3.6355	0.9316	-1.9644	Down	9.4651e-46	3.1942e-44	gi|357113252|ref|XP_003558418.1|	1332	0	PREDICTED: disease resistance protein RPM1-like [Brachypodium distachyon]	sp|Q39214|RPM1_ARATH	460	2e-129	Disease resistance protein RPM1 OS=Arabidopsis thaliana GN=RPM1 PE=1 SV=1	alr0124_1	77	2e-13	COG4886	Leucine-rich repeat (LRR) protein	K13457	7e-171	600	sbi:SORBI_10g028730	disease resistance protein RPM1	-	-	-	ko04626//Plant-pathogen interaction
Unigene17990_All	467	196	12	13.764	0.8638	-3.9941	Down	2.6382e-43	8.5031e-42	gi|357118960|ref|XP_003561215.1|	198	3e-50	PREDICTED: disease resistance protein RPM1-like [Brachypodium distachyon]	sp|Q9M667|RPP13_ARATH	59.3	9e-10	Disease resistance protein RPP13 OS=Arabidopsis thaliana GN=RPP13 PE=2 SV=2	--	--	--	--	--	K13457	3e-11	65.9	vvi:100252764	disease resistance protein RPM1	GO:0006952//defense response	GO:0043531//ADP binding	-	ko04626//Plant-pathogen interaction
CL7239.Contig4_All	3972	426	122	3.5173	1.0325	-1.7683	Down	5.1588e-39	1.51e-37	gi|357113252|ref|XP_003558418.1|	1317.4	0	PREDICTED: disease resistance protein RPM1-like [Brachypodium distachyon]	sp|Q39214|RPM1_ARATH	457	2e-128	Disease resistance protein RPM1 OS=Arabidopsis thaliana GN=RPM1 PE=1 SV=1	alr0124_1	78.2	1e-13	COG4886	Leucine-rich repeat (LRR) protein	K13457	2e-172	605	sbi:SORBI_10g028730	disease resistance protein RPM1	-	-	-	ko04626//Plant-pathogen interaction
CL15522.Contig1_All	1585	357	89	7.3866	1.8876	-1.9684	Down	7.4489e-38	2.1181e-36	gi|357114686|ref|XP_003559127.1|	735.7	0	PREDICTED: disease resistance protein RPM1-like [Brachypodium distachyon]	sp|Q39214|RPM1_ARATH	232	5e-61	Disease resistance protein RPM1 OS=Arabidopsis thaliana GN=RPM1 PE=1 SV=1	alr0124_1	59.7	1e-08	COG4886	Leucine-rich repeat (LRR) protein	K13457	4e-80	297	vvi:100252764	disease resistance protein RPM1	GO:0006952//defense response	GO:0043531//ADP binding	-	ko04626//Plant-pathogen interaction
CL3622.Contig6_All	3953	636	268	5.2764	2.279	-1.2112	Down	2.0699e-33	5.232e-32	gi|357110716|ref|XP_003557162.1|	203.4	2e-117	PREDICTED: disease resistance protein RPM1-like [Brachypodium distachyon]	sp|P0C8S1|RP8L2_ARATH	75.5	2e-13	Probable disease resistance RPP8-like protein 2 OS=Arabidopsis thaliana GN=RPP8L2 PE=1 SV=1	--	--	--	--	--	K13457	2e-33	102	rcu:RCOM_0742270	disease resistance protein RPM1	-	-	GO:0016023//cytoplasmic membrane-bounded vesicle	ko04626//Plant-pathogen interaction
CL4636.Contig4_All	4171	620	296	4.8748	2.3856	-1.031	Down	1.5474e-25	3.0734e-24	gi|357139691|ref|XP_003571412.1|	1035	0	PREDICTED: disease resistance protein RPM1-like [Brachypodium distachyon]	sp|Q39214|RPM1_ARATH	260	5e-69	Disease resistance protein RPM1 OS=Arabidopsis thaliana GN=RPM1 PE=1 SV=1	MA2301_1	54.3	2e-06	COG4886	Leucine-rich repeat (LRR) protein	K13457	2e-90	333	vvi:100252764	disease resistance protein RPM1	-	-	-	ko04626//Plant-pathogen interaction
CL11476.Contig2_All	690	72	4	3.4221	0.1949	-4.1341	Down	4.4191e-17	6.1166e-16	gi|357135028|ref|XP_003569114.1|	395.6	3e-109	PREDICTED: disease resistance protein RPM1-like [Brachypodium distachyon]	sp|Q9C646|RX24L_ARATH	110	7e-25	Probable disease resistance protein RXW24L OS=Arabidopsis thaliana GN=RXW24L PE=2 SV=1	--	--	--	--	--	K13457	3e-29	126	rcu:RCOM_0742270	disease resistance protein RPM1	GO:0006952//defense response	GO:0043531//ADP binding	GO:0016023//cytoplasmic membrane-bounded vesicle	ko04626//Plant-pathogen interaction
Unigene30488_All	618	46	0	2.441	0	-11.2533	Down	2.5314e-14	2.9864e-13	gi|357135077|ref|XP_003569138.1|	158.7	5e-38	PREDICTED: disease resistance protein RPM1-like [Brachypodium distachyon]	sp|Q9FJB5|RP8L3_ARATH	62.4	2e-10	Disease resistance RPP8-like protein 3 OS=Arabidopsis thaliana GN=RPP8L3 PE=2 SV=1	--	--	--	--	--	K13457	3e-19	93.2	vvi:100252764	disease resistance protein RPM1	GO:0006952//defense response;GO:0006915//apoptotic process	GO:0005524//ATP binding	GO:0016023//cytoplasmic membrane-bounded vesicle	ko04626//Plant-pathogen interaction
CL11573.Contig1_All	590	57	8	3.1683	0.4558	-2.7972	Down	3.3262e-10	2.9197e-09	gi|357135028|ref|XP_003569114.1|	55.1	7e-07	PREDICTED: disease resistance protein RPM1-like [Brachypodium distachyon]	sp|Q39214|RPM1_ARATH	51.2	2e-14	Disease resistance protein RPM1 OS=Arabidopsis thaliana GN=RPM1 PE=1 SV=1	--	--	--	--	--	K13457	4e-24	68.2	vvi:100252764	disease resistance protein RPM1	GO:0006915//apoptotic process;GO:0006952//defense response	GO:0005524//ATP binding	-	ko04626//Plant-pathogen interaction
Unigene7686_All	882	146	65	5.4286	2.4774	-1.1318	Down	4.9112e-08	3.4811e-07	gi|357157118|ref|XP_003577691.1|	355.9	4e-97	PREDICTED: disease resistance protein RPM1-like [Brachypodium distachyon]	sp|A7XGN8|LOV1B_ARATH	72	4e-13	Disease susceptibility protein LOV1 OS=Arabidopsis thaliana GN=LOV1 PE=1 SV=1	--	--	--	--	--	K13457	9e-82	301	zma:606485	disease resistance protein RPM1	GO:0006952//defense response	GO:0043531//ADP binding	-	ko04626//Plant-pathogen interaction
RIN4
CL1992.Contig2_All	1231	28	63	0.7459	1.7204	1.2057	Up	0.00013928	0.00058771	gi|357149100|ref|XP_003575000.1|	111.3	2e-97	PREDICTED: RPM1-interacting protein 4-like [Brachypodium distachyon]	sp|Q8GYN5|RIN4_ARATH	56.6	3e-08	RPM1-interacting protein 4 OS=Arabidopsis thaliana GN=RIN4 PE=1 SV=1	--	--	--	--	--	K13456	1e-10	65.9	zma:100275697	RPM1-interacting protein 4	-	-	-	ko04626//Plant-pathogen interaction
CL10916.Contig3_All	1269	1999	748	51.6604	19.8145	-1.3825	Down	6.6432e-124	6.3011e-122	gi|359268817|gb|AEV12220.1|	379.8	4e-104	RIN4 [Hordeum vulgare subsp. vulgare]	sp|Q8GYN5|RIN4_ARATH	119	3e-27	RPM1-interacting protein 4 OS=Arabidopsis thaliana GN=RIN4 PE=1 SV=1	DR2133	54.3	4e-07	COG4372	Uncharacterized protein conserved in bacteria with the myosin-like domain	K13456	7e-89	325	sbi:SORBI_07g026510	RPM1-interacting protein 4	-	-	-	ko04626//Plant-pathogen interaction
CL10916.Contig4_All	2176	2443	1003	36.8189	15.4948	-1.2487	Down	2.6256e-129	2.6301e-127	gi|359268817|gb|AEV12220.1|	357.1	6e-97	RIN4 [Hordeum vulgare subsp. vulgare]	sp|Q8GYN5|RIN4_ARATH	115	8e-26	RPM1-interacting protein 4 OS=Arabidopsis thaliana GN=RIN4 PE=1 SV=1	DR2133	53.9	1e-06	COG4372	Uncharacterized protein conserved in bacteria with the myosin-like domain	K13456	6e-84	310	sbi:SORBI_07g026510	RPM1-interacting protein 4	-	-	-	ko04626//Plant-pathogen interaction
CL10916.Contig5_All	1155	1131	487	32.1135	14.1739	-1.1799	Down	8.2862e-56	3.4089e-54	gi|359268817|gb|AEV12220.1|	378.3	1e-103	RIN4 [Hordeum vulgare subsp. vulgare]	sp|Q8GYN5|RIN4_ARATH	119	3e-27	RPM1-interacting protein 4 OS=Arabidopsis thaliana GN=RIN4 PE=1 SV=1	DR2133	54.3	4e-07	COG4372	Uncharacterized protein conserved in bacteria with the myosin-like domain	K13456	2e-88	324	sbi:SORBI_07g026510	RPM1-interacting protein 4	-	-	-	ko04626//Plant-pathogen interaction
CL10916.Contig6_All	2062	1647	784	26.1946	12.7812	-1.0352	Down	1.7999e-65	8.6271e-64	gi|359268817|gb|AEV12220.1|	355.5	1e-96	RIN4 [Hordeum vulgare subsp. vulgare]	sp|Q8GYN5|RIN4_ARATH	115	7e-26	RPM1-interacting protein 4 OS=Arabidopsis thaliana GN=RIN4 PE=1 SV=1	DR2133	53.9	1e-06	COG4372	Uncharacterized protein conserved in bacteria with the myosin-like domain	K13456	2e-83	308	sbi:SORBI_07g026510	RPM1-interacting protein 4	-	-	-	ko04626//Plant-pathogen interaction
SGT1
CL3879.Contig2_All	2323	1341	3295	18.9316	47.6814	1.3326	Up	1.908e-197	3.1141e-195	gi|357135595|ref|XP_003569394.1|	672.5	0	PREDICTED: protein SGT1 homolog [Brachypodium distachyon]	sp|Q0JL44|SGT1_ORYSJ	627	7e-180	Protein SGT1 homolog OS=Oryza sativa subsp. japonica GN=SGT1 PE=1 SV=1	YOR057w	126	1e-28	COG5091	Suppressor of G2 allele of skp1 and related proteins	K12795	0	672	bdi:100838478	suppressor of G2 allele of SKP1	GO:0009867//jasmonic acid mediated signaling pathway;GO:0006511//ubiquitin-dependent protein catabolic process;GO:0050832//defense response to fungus;GO:0009734//auxin mediated signaling pathway	-	GO:0005634//nucleus	ko04626//Plant-pathogen interaction
CL3879.Contig1_All	1654	1704	3520	33.7863	71.5402	1.0823	Up	4.0325e-152	4.8442e-150	gi|357135595|ref|XP_003569394.1|	677.9	0	PREDICTED: protein SGT1 homolog [Brachypodium distachyon]	sp|Q0JL44|SGT1_ORYSJ	634	0	Protein SGT1 homolog OS=Oryza sativa subsp. japonica GN=SGT1 PE=1 SV=1	YOR057w	125	2e-28	COG5091	Suppressor of G2 allele of skp1 and related proteins	K12795	0	677	bdi:100838478	suppressor of G2 allele of SKP1	GO:0009867//jasmonic acid mediated signaling pathway;GO:0006511//ubiquitin-dependent protein catabolic process;GO:0050832//defense response to fungus;GO:0009734//auxin mediated signaling pathway	-	GO:0005634//nucleus	ko04626//Plant-pathogen interaction
HSP90
CL898.Contig1_All	1713	13	2480	0.2489	48.6673	7.6112	Up	0	0	gi|294717863|gb|ADF31779.1|	934.5	0	heat shock protein 90 [Triticum dicoccoides]	sp|Q08277|HSP82_MAIZE	899	0	Heat shock protein 82 OS=Zea mays GN=HSP82 PE=3 SV=1	SPAC926.04c	628	8e-180	COG0326	Molecular chaperone, HSP90 family	K04079	0	934	bdi:100824256	molecular chaperone HtpG	GO:0009414//response to water deprivation;GO:0006457//protein folding;GO:0009651//response to salt stress;GO:0010286//heat acclimation;GO:0009908//flower development;GO:0050821//protein stabilization;GO:0071277//cellular response to calcium ion;GO:0048366//leaf development;GO:0046685//response to arsenic-containing substance;GO:0009644//response to high light intensity;GO:0042542//response to hyd…	GO:0005524//ATP binding;GO:0051082//unfolded protein binding	GO:0005829//cytosol;GO:0005618//cell wall;GO:0005739//mitochondrion;GO:0005730//nucleolus;GO:0005886//plasma membrane;GO:0048046//apoplast	ko04626//Plant-pathogen interaction;ko04141//Protein processing in endoplasmic reticulum
CL898.Contig4_All	458	2	317	0.1432	23.2668	7.3441	Up	9.4416e-94	6.4905e-92	gi|294717863|gb|ADF31779.1|	293.9	4e-79	heat shock protein 90 [Triticum dicoccoides]	sp|P27323|HS901_ARATH	280	2e-76	Heat shock protein 90-1 OS=Arabidopsis thaliana GN=HSP90-1 PE=1 SV=3	SPAC926.04c	233	1e-61	COG0326	Molecular chaperone, HSP90 family	K04079	8e-79	290	bdi:100824256	molecular chaperone HtpG	GO:0006952//defense response;GO:0009414//response to water deprivation;GO:0006457//protein folding;GO:0009651//response to salt stress;GO:0010286//heat acclimation;GO:0009908//flower development;GO:0050821//protein stabilization;GO:0071277//cellular response to calcium ion;GO:0048366//leaf development	GO:0005524//ATP binding;GO:0051082//unfolded protein binding	GO:0005829//cytosol;GO:0005618//cell wall;GO:0005739//mitochondrion;GO:0005730//nucleolus;GO:0005886//plasma membrane;GO:0048046//apoplast	ko04626//Plant-pathogen interaction;ko04141//Protein processing in endoplasmic reticulum
CL898.Contig2_All	525	2	134	0.1249	8.58	6.1021	Up	2.0743e-38	5.9792e-37	gi|189202774|ref|XP_001937723.1|	216.5	1e-55	heat shock protein 90 [Pyrenophora tritici-repentis Pt-1C-BFP]	sp|O03986|HS904_ARATH	211	3e-55	Heat shock protein 90-4 OS=Arabidopsis thaliana GN=HSP90-4 PE=2 SV=1	SPAC926.04c	212	3e-55	COG0326	Molecular chaperone, HSP90 family	K04079	7e-55	211	gmx:100194423	molecular chaperone HtpG	GO:0071277//cellular response to calcium ion;GO:0009908//flower development;GO:0010286//heat acclimation;GO:0006457//protein folding;GO:0009414//response to water deprivation;GO:0090332//stomatal closure;GO:0009816//defense response to bacterium, incompatible interaction;GO:0009612//response to mechanical stimulus;GO:0009651//response to salt stress;GO:0050821//protein stabilization;GO:0019722//c…	GO:0051082//unfolded protein binding;GO:0016887//ATPase activity;GO:0005524//ATP binding	GO:0005774//vacuolar membrane;GO:0048046//apoplast;GO:0005618//cell wall;GO:0005794//Golgi apparatus;GO:0005730//nucleolus;GO:0005829//cytosol;GO:0009570//chloroplast stroma;GO:0009506//plasmodesma;GO:0005886//plasma membrane;GO:0005739//mitochondrion	ko04626//Plant-pathogen interaction;ko04141//Protein processing in endoplasmic reticulum
CL15329.Contig2_All	354	1	40	0.0926	3.7984	5.3582	Up	1.1882e-11	1.1726e-10	gi|60656557|gb|AAX33296.1|	156	1e-37	heat shock protein 90 [Paracoccidioides brasiliensis]	sp|P51819|HSP83_IPONI	149	4e-37	Heat shock protein 83 OS=Ipomoea nil GN=HSP83A PE=2 SV=1	YMR186w	191	2e-49	COG0326	Molecular chaperone, HSP90 family	K04079	9e-38	152	vvi:100265661	molecular chaperone HtpG	GO:0006457//protein folding;GO:0006950//response to stress	GO:0051082//unfolded protein binding;GO:0005524//ATP binding	GO:0005737//cytoplasm	ko04626//Plant-pathogen interaction;ko04141//Protein processing in endoplasmic reticulum
Unigene45696_All	656	13	274	0.6499	14.0407	4.4333	Up	1.8501e-66	8.9902e-65	gi|189202774|ref|XP_001937723.1|	353.2	1e-96	heat shock protein 90 [Pyrenophora tritici-repentis Pt-1C-BFP]	sp|P27323|HS901_ARATH	351	2e-97	Heat shock protein 90-1 OS=Arabidopsis thaliana GN=HSP90-1 PE=1 SV=3	YMR186w	386	2e-107	COG0326	Molecular chaperone, HSP90 family	K04079	2e-97	353	sbi:SORBI_02g028050	molecular chaperone HtpG	GO:0009414//response to water deprivation;GO:0006457//protein folding;GO:0009651//response to salt stress;GO:0010286//heat acclimation;GO:0009908//flower development;GO:0050821//protein stabilization;GO:0071277//cellular response to calcium ion;GO:0048366//leaf development;GO:0046685//response to arsenic-containing substance;GO:0009644//response to high light intensity;GO:0042542//response to hyd…	GO:0005524//ATP binding;GO:0051082//unfolded protein binding	GO:0005829//cytosol;GO:0005618//cell wall;GO:0005739//mitochondrion;GO:0005730//nucleolus;GO:0005886//plasma membrane;GO:0048046//apoplast	ko04626//Plant-pathogen interaction;ko04141//Protein processing in endoplasmic reticulum
CL15329.Contig1_All	719	16	145	0.7298	6.7793	3.2156	Up	3.788e-28	8.2055e-27	gi|311303102|gb|ADP89125.1|	281.2	9e-75	heat shock protein 90 [Cenchrus americanus] >gi|311303104|gb|ADP89126.1| heat shock protein 90 [Cenchrus americanus]	sp|P36182|HSP82_TOBAC	278	3e-75	Heat shock protein 82 (Fragment) OS=Nicotiana tabacum GN=HSP82 PE=2 SV=1	YMR186w	340	1e-93	COG0326	Molecular chaperone, HSP90 family	K04079	3e-75	279	sbi:SORBI_02g028050	molecular chaperone HtpG	GO:0006952//defense response;GO:0009414//response to water deprivation;GO:0006457//protein folding;GO:0009651//response to salt stress;GO:0010286//heat acclimation;GO:0009908//flower development;GO:0050821//protein stabilization;GO:0071277//cellular response to calcium ion;GO:0048366//leaf development	GO:0005524//ATP binding;GO:0051082//unfolded protein binding	GO:0005829//cytosol;GO:0005618//cell wall;GO:0005739//mitochondrion;GO:0005730//nucleolus;GO:0005886//plasma membrane;GO:0048046//apoplast	ko04626//Plant-pathogen interaction;ko04141//Protein processing in endoplasmic reticulum
CL898.Contig10_All	803	1834	13697	74.9015	573.394	2.9365	Up	0	0	gi|311303102|gb|ADP89125.1|	436	2e-121	heat shock protein 90 [Cenchrus americanus] >gi|311303104|gb|ADP89126.1| heat shock protein 90 [Cenchrus americanus]	sp|Q07078|HSP83_ORYSJ	432	1e-121	Heat shock protein 81-3 OS=Oryza sativa subsp. japonica GN=HSP81-3 PE=2 SV=2	SPAC926.04c	317	2e-86	COG0326	Molecular chaperone, HSP90 family	K04079	3e-121	432	osa:4347405	molecular chaperone HtpG	GO:0006952//defense response;GO:0009414//response to water deprivation;GO:0006457//protein folding;GO:0009651//response to salt stress;GO:0010286//heat acclimation;GO:0009908//flower development;GO:0050821//protein stabilization;GO:0071277//cellular response to calcium ion;GO:0048366//leaf development	GO:0005524//ATP binding;GO:0051082//unfolded protein binding	GO:0005829//cytosol;GO:0005618//cell wall;GO:0005739//mitochondrion;GO:0005730//nucleolus;GO:0005886//plasma membrane;GO:0048046//apoplast	ko04626//Plant-pathogen interaction;ko04141//Protein processing in endoplasmic reticulum
Unigene13091_All	494	19	80	1.2613	5.4438	2.1097	Up	1.2377e-10	1.127e-09	gi|357967091|gb|AET97610.1|	221.5	3e-57	heat shock protein 90a [Paraphaeosphaeria minitans]	sp|P36181|HSP80_SOLLC	216	7e-57	Heat shock cognate protein 80 OS=Solanum lycopersicum GN=HSC80 PE=2 SV=1	SPAC926.04c	222	3e-58	COG0326	Molecular chaperone, HSP90 family	K04079	1e-56	216	sbi:SORBI_07g028270	molecular chaperone HtpG	GO:0071277//cellular response to calcium ion;GO:0009908//flower development;GO:0010286//heat acclimation;GO:0006457//protein folding;GO:0009414//response to water deprivation;GO:0090332//stomatal closure;GO:0009816//defense response to bacterium, incompatible interaction;GO:0009612//response to mechanical stimulus;GO:0009651//response to salt stress;GO:0050821//protein stabilization;GO:0019722//c…	GO:0051082//unfolded protein binding;GO:0016887//ATPase activity;GO:0005524//ATP binding	GO:0048046//apoplast;GO:0005618//cell wall;GO:0005794//Golgi apparatus;GO:0005730//nucleolus;GO:0005829//cytosol;GO:0009506//plasmodesma;GO:0005886//plasma membrane;GO:0005739//mitochondrion	ko04626//Plant-pathogen interaction;ko04141//Protein processing in endoplasmic reticulum
CL898.Contig5_All	2643	3271	13074	40.5873	166.286	2.0346	Up	0	0	gi|260408197|gb|ACX37413.1|	1347.4	0	cytosolic heat shock protein 90.1 [Dactylis glomerata]	sp|Q0J4P2|HSP81_ORYSJ	1343	0	Heat shock protein 81-1 OS=Oryza sativa subsp. japonica GN=HSP81-1 PE=2 SV=2	SPAC926.04c	946	0	COG0326	Molecular chaperone, HSP90 family	K04079	0	1339	osa:4347405	molecular chaperone HtpG	GO:0006952//defense response;GO:0009414//response to water deprivation;GO:0006457//protein folding;GO:0009651//response to salt stress;GO:0010286//heat acclimation;GO:0009908//flower development;GO:0050821//protein stabilization;GO:0071277//cellular response to calcium ion;GO:0048366//leaf development	GO:0005524//ATP binding;GO:0051082//unfolded protein binding	GO:0005829//cytosol;GO:0005618//cell wall;GO:0005739//mitochondrion;GO:0005730//nucleolus;GO:0005886//plasma membrane;GO:0048046//apoplast	ko04626//Plant-pathogen interaction;ko04141//Protein processing in endoplasmic reticulum
CL898.Contig6_All	2557	5026	16906	64.4612	222.256	1.7857	Up	0	0	gi|260408197|gb|ACX37413.1|	1347	0	cytosolic heat shock protein 90.1 [Dactylis glomerata]	sp|Q0J4P2|HSP81_ORYSJ	1342	0	Heat shock protein 81-1 OS=Oryza sativa subsp. japonica GN=HSP81-1 PE=2 SV=2	SPAC926.04c	944	0	COG0326	Molecular chaperone, HSP90 family	K04079	0	1342	sbi:SORBI_07g028270	molecular chaperone HtpG	GO:0006952//defense response;GO:0009414//response to water deprivation;GO:0006457//protein folding;GO:0009651//response to salt stress;GO:0010286//heat acclimation;GO:0009908//flower development;GO:0050821//protein stabilization;GO:0071277//cellular response to calcium ion;GO:0048366//leaf development	GO:0005524//ATP binding;GO:0051082//unfolded protein binding	GO:0005829//cytosol;GO:0005618//cell wall;GO:0005739//mitochondrion;GO:0005730//nucleolus;GO:0005886//plasma membrane;GO:0048046//apoplast	ko04626//Plant-pathogen interaction;ko04141//Protein processing in endoplasmic reticulum
CL898.Contig3_All	760	854	2753	36.8511	121.769	1.7244	Up	5.1004e-241	1.0229e-238	gi|260408197|gb|ACX37413.1|	417.5	9e-116	cytosolic heat shock protein 90.1 [Dactylis glomerata]	sp|Q0J4P2|HSP81_ORYSJ	414	4e-116	Heat shock protein 81-1 OS=Oryza sativa subsp. japonica GN=HSP81-1 PE=2 SV=2	SPAC926.04c	310	2e-84	COG0326	Molecular chaperone, HSP90 family	K04079	1e-115	414	zma:100384473	molecular chaperone HtpG	GO:0006952//defense response;GO:0009414//response to water deprivation;GO:0006457//protein folding;GO:0009651//response to salt stress;GO:0010286//heat acclimation;GO:0009908//flower development;GO:0050821//protein stabilization;GO:0071277//cellular response to calcium ion;GO:0048366//leaf development	GO:0005524//ATP binding;GO:0051082//unfolded protein binding	GO:0005829//cytosol;GO:0005618//cell wall;GO:0005739//mitochondrion;GO:0005730//nucleolus;GO:0005886//plasma membrane;GO:0048046//apoplast	ko04626//Plant-pathogen interaction;ko04141//Protein processing in endoplasmic reticulum
CL898.Contig8_All	1436	1704	5369	38.9154	125.685	1.6914	Up	0	0	gi|260408197|gb|ACX37413.1|	652.5	0	cytosolic heat shock protein 90.1 [Dactylis glomerata]	sp|Q07078|HSP83_ORYSJ	645	0	Heat shock protein 81-3 OS=Oryza sativa subsp. japonica GN=HSP81-3 PE=2 SV=2	SPAC926.04c	431	2e-120	COG0326	Molecular chaperone, HSP90 family	K04079	0	645	sbi:SORBI_07g028270	molecular chaperone HtpG	GO:0006952//defense response;GO:0009414//response to water deprivation;GO:0006457//protein folding;GO:0009651//response to salt stress;GO:0010286//heat acclimation;GO:0009908//flower development;GO:0050821//protein stabilization;GO:0071277//cellular response to calcium ion;GO:0048366//leaf development	GO:0005524//ATP binding;GO:0051082//unfolded protein binding	GO:0005829//cytosol;GO:0005618//cell wall;GO:0005739//mitochondrion;GO:0005730//nucleolus;GO:0005886//plasma membrane;GO:0048046//apoplast	ko04626//Plant-pathogen interaction;ko04141//Protein processing in endoplasmic reticulum
Unigene3765_All	531	41	103	2.5322	6.5206	1.3646	Up	7.5908e-08	5.2866e-07	gi|357967091|gb|AET97610.1|	256.1	1e-67	heat shock protein 90a [Paraphaeosphaeria minitans]	sp|Q07078|HSP83_ORYSJ	245	1e-65	Heat shock protein 81-3 OS=Oryza sativa subsp. japonica GN=HSP81-3 PE=2 SV=2	SPAC926.04c	281	4e-76	COG0326	Molecular chaperone, HSP90 family	K04079	5e-66	248	zma:100384478	molecular chaperone HtpG	GO:0006952//defense response;GO:0009414//response to water deprivation;GO:0006457//protein folding;GO:0009651//response to salt stress;GO:0010286//heat acclimation;GO:0009908//flower development;GO:0050821//protein stabilization;GO:0071277//cellular response to calcium ion;GO:0048366//leaf development	GO:0005524//ATP binding;GO:0051082//unfolded protein binding	GO:0005829//cytosol;GO:0005618//cell wall;GO:0005739//mitochondrion;GO:0005730//nucleolus;GO:0005886//plasma membrane;GO:0048046//apoplast	ko04626//Plant-pathogen interaction;ko04141//Protein processing in endoplasmic reticulum
CL898.Contig9_All	271	186	907	22.5087	112.507	2.3215	Up	1.8996e-118	1.7141e-116	gi|371781490|gb|CCA95103.1|	177.2	5e-44	putative heat shock protein 90, partial [Lonicera maackii]	sp|Q07078|HSP83_ORYSJ	174	1e-44	Heat shock protein 81-3 OS=Oryza sativa subsp. japonica GN=HSP81-3 PE=2 SV=2	YPL240c	125	2e-29	COG0326	Molecular chaperone, HSP90 family	K04079	4e-45	177	aly:ARALYDRAFT_913901	molecular chaperone HtpG	GO:0006952//defense response;GO:0009414//response to water deprivation;GO:0006457//protein folding;GO:0009651//response to salt stress;GO:0010286//heat acclimation;GO:0009908//flower development;GO:0050821//protein stabilization;GO:0071277//cellular response to calcium ion;GO:0048366//leaf development	GO:0005524//ATP binding;GO:0051082//unfolded protein binding	GO:0005829//cytosol;GO:0005618//cell wall;GO:0005739//mitochondrion;GO:0005730//nucleolus;GO:0005886//plasma membrane;GO:0048046//apoplast	ko04626//Plant-pathogen interaction;ko04141//Protein processing in endoplasmic reticulum
